# Supplementary material for: Proton-induced fluorescence in modified quino[7,8-h]quinolines: dual sensing for protons and π-donors
Source: Royal Society of Chemistry journal article supplement (doi:10.1039/c9ob01391a), 2019-01-01
Supplement: c9ob01391a1.pdf [file c9ob01391a1.pdf]

## Supporting information

### Proton-induced fluorescence in modified quino[7,8-*h*]quinolines: dual sensing for protons and $\pi$ -donors

Alexander F. Pozharskii,<sup>a</sup> Valery A. Ozeryanskii,<sup>\*a</sup> Vladimir Y. Mikshiev,<sup>a§</sup>  
Anatoly V. Chernyshev,<sup>b</sup> Anatoly V. Metelitsa,<sup>b</sup> and Alexander S. Antonov<sup>a§</sup>

<sup>a</sup> *Department of Organic Chemistry, Southern Federal University, Zorge str. 7, 344090 Rostov-on-Don, Russian Federation. E-mail: vv\_ozer2@sfedu.ru*

<sup>b</sup> *Institute of Physical and Organic Chemistry, Southern Federal University, Stachki Ave. 194/2, 344090 Rostov-on-Don, Russian Federation*

<sup>§</sup> *Current address: Institute of Chemistry, St. Petersburg State University, Universitetskii pr. 26, 198504 St. Petersburg, Russian Federation*

#### Table of contents

|                                                                                       |     |
|---------------------------------------------------------------------------------------|-----|
| <sup>1</sup> H and <sup>13</sup> C NMR spectra of new compounds (Figures S1–S28)..... | S2  |
| Gas-phase proton affinities .....                                                     | S16 |
| Selected absorption and emission parameters of the studied compounds (Table S1) ....  | S17 |
| Absorption and fluorescence spectra with selected additives (Figures S29–S45).....    | S18 |
| Crystal data and structure refinement for the studied compounds (Table S2).....       | S28 |

**<sup>1</sup>H and <sup>13</sup>C NMR spectra of new compounds**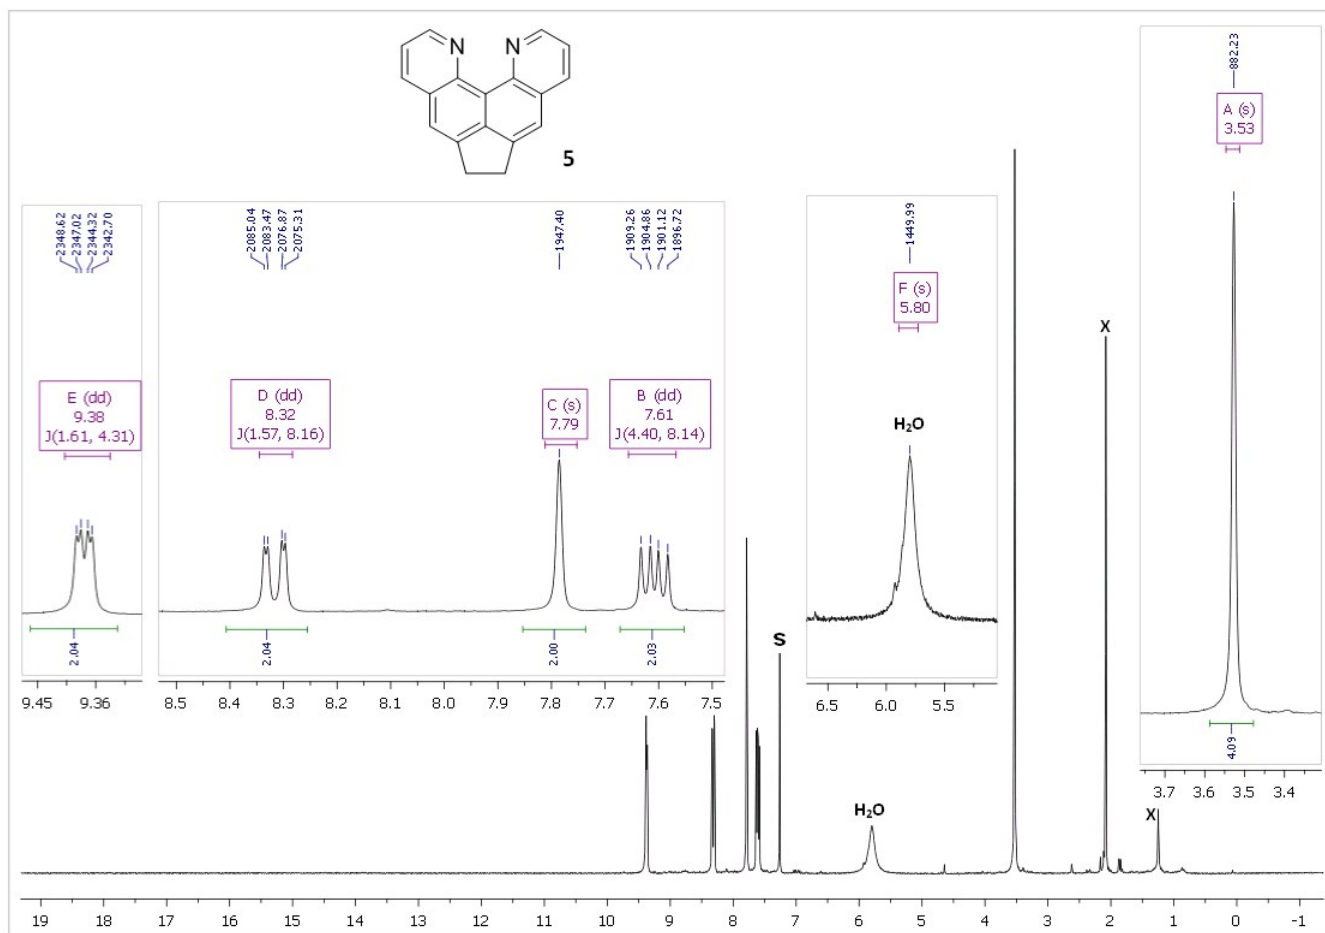**Figure S1.** <sup>1</sup>H NMR spectrum of **5** (CDCl<sub>3</sub>, 250 MHz).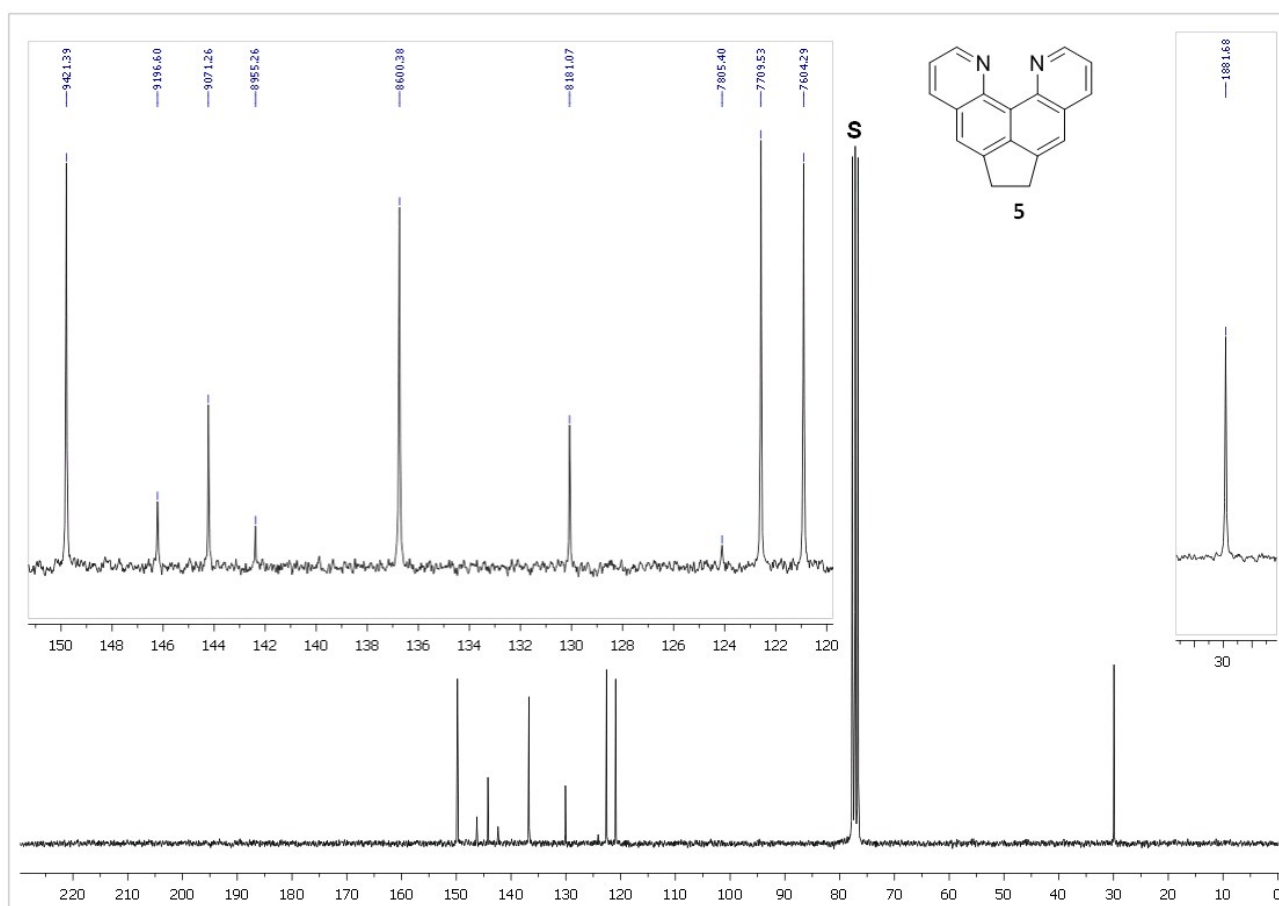**Figure S2.** <sup>13</sup>C NMR spectrum of **5** (CDCl<sub>3</sub>, 63 MHz).

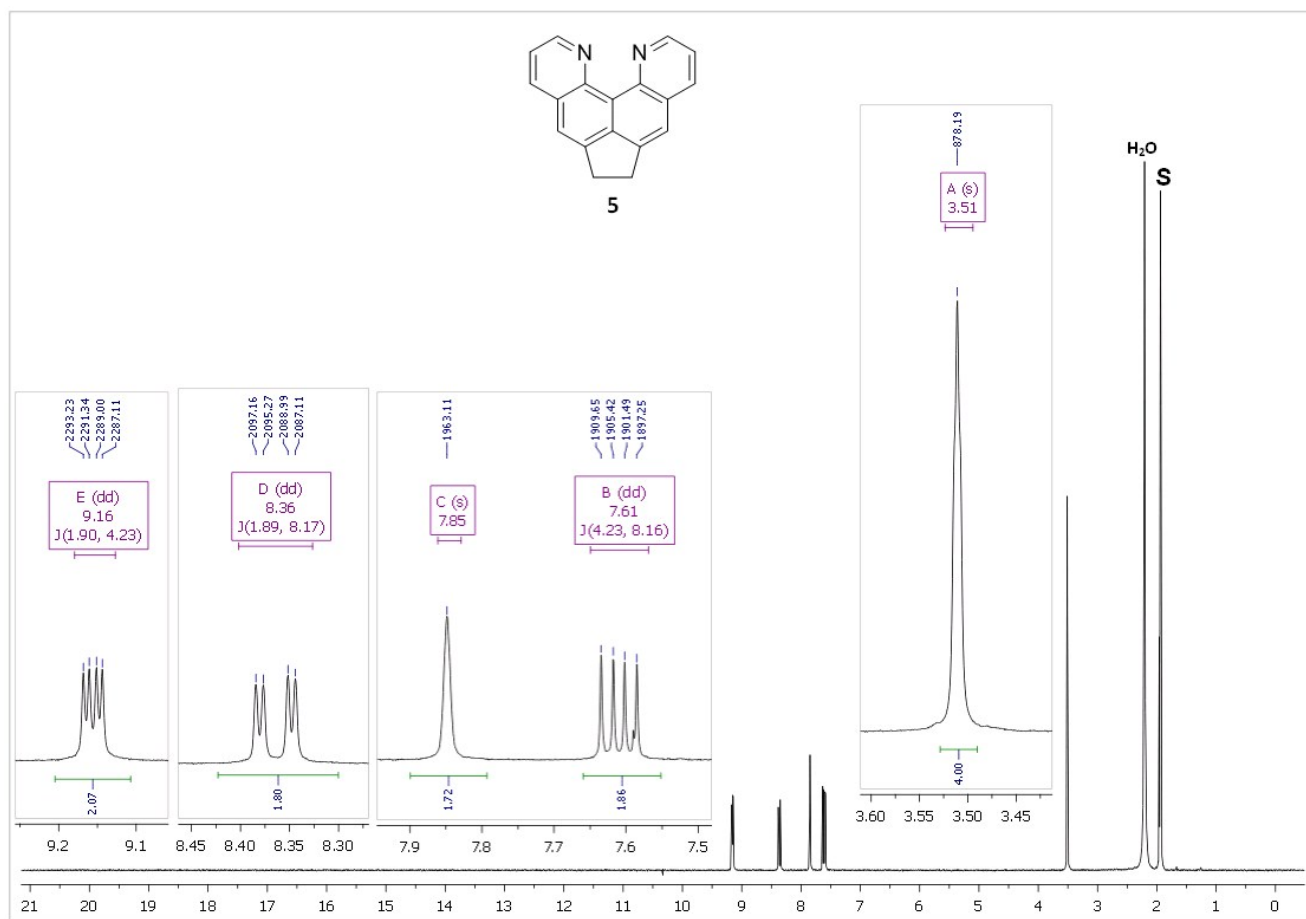

**Figure S3.** <sup>1</sup>H NMR spectrum of **5** (CD<sub>3</sub>CN, 250 MHz).

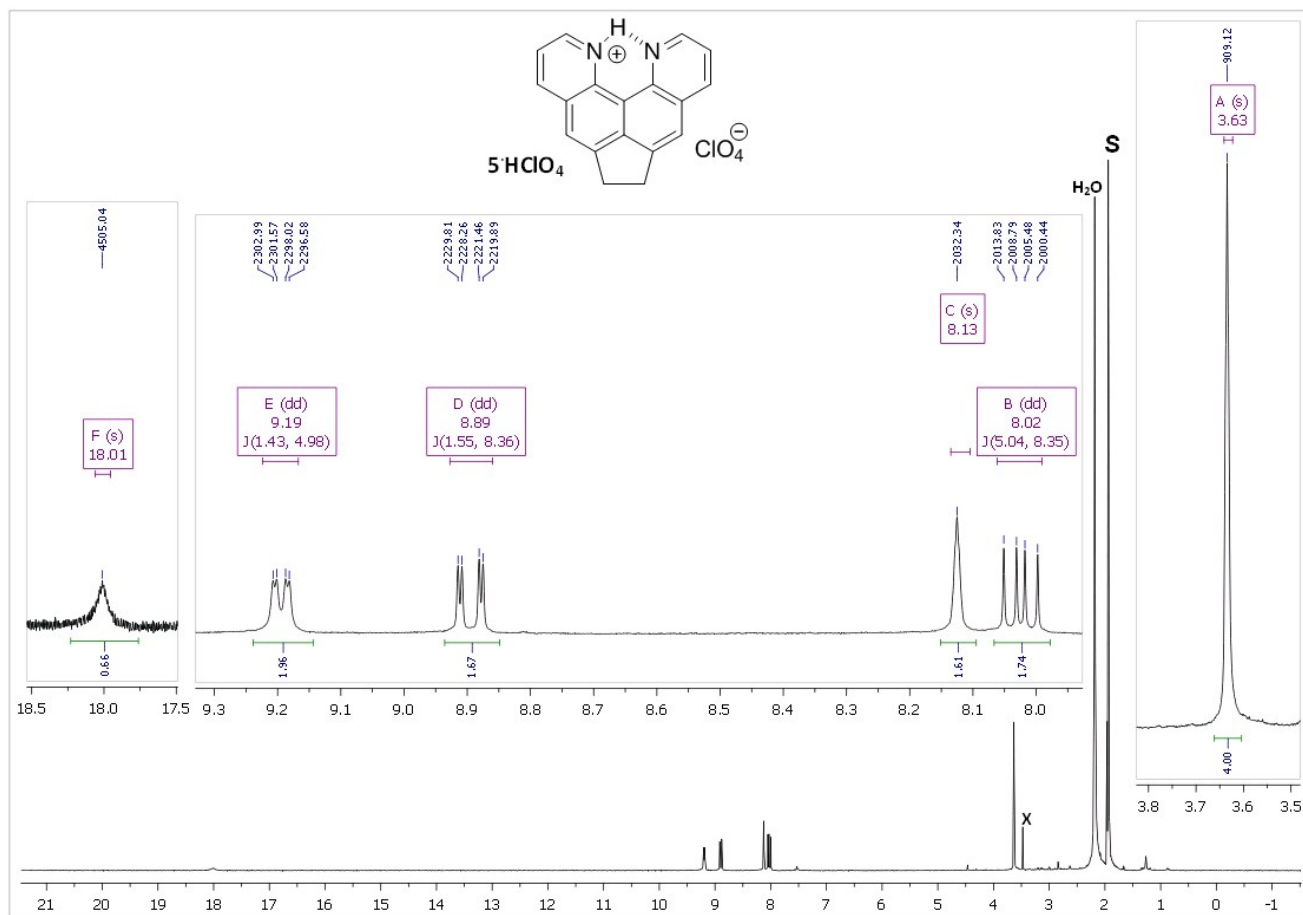

**Figure S4.** <sup>1</sup>H NMR spectrum of **5·HClO<sub>4</sub>** (CD<sub>3</sub>CN, 250 MHz).

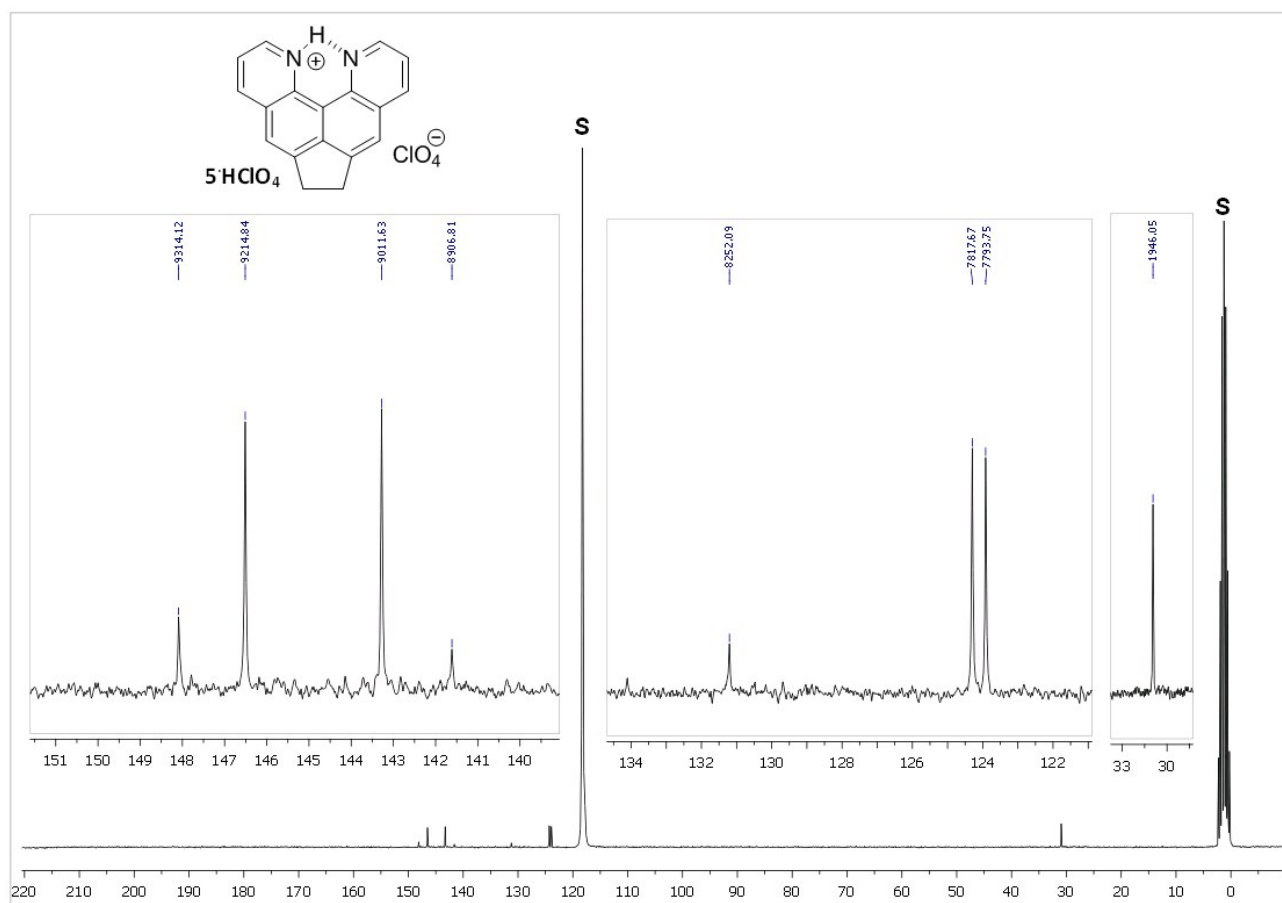

Figure S5.  $^{13}\text{C}$  NMR spectrum of  $5\text{-HClO}_4$  ( $\text{CD}_3\text{CN}$ , 63 MHz).

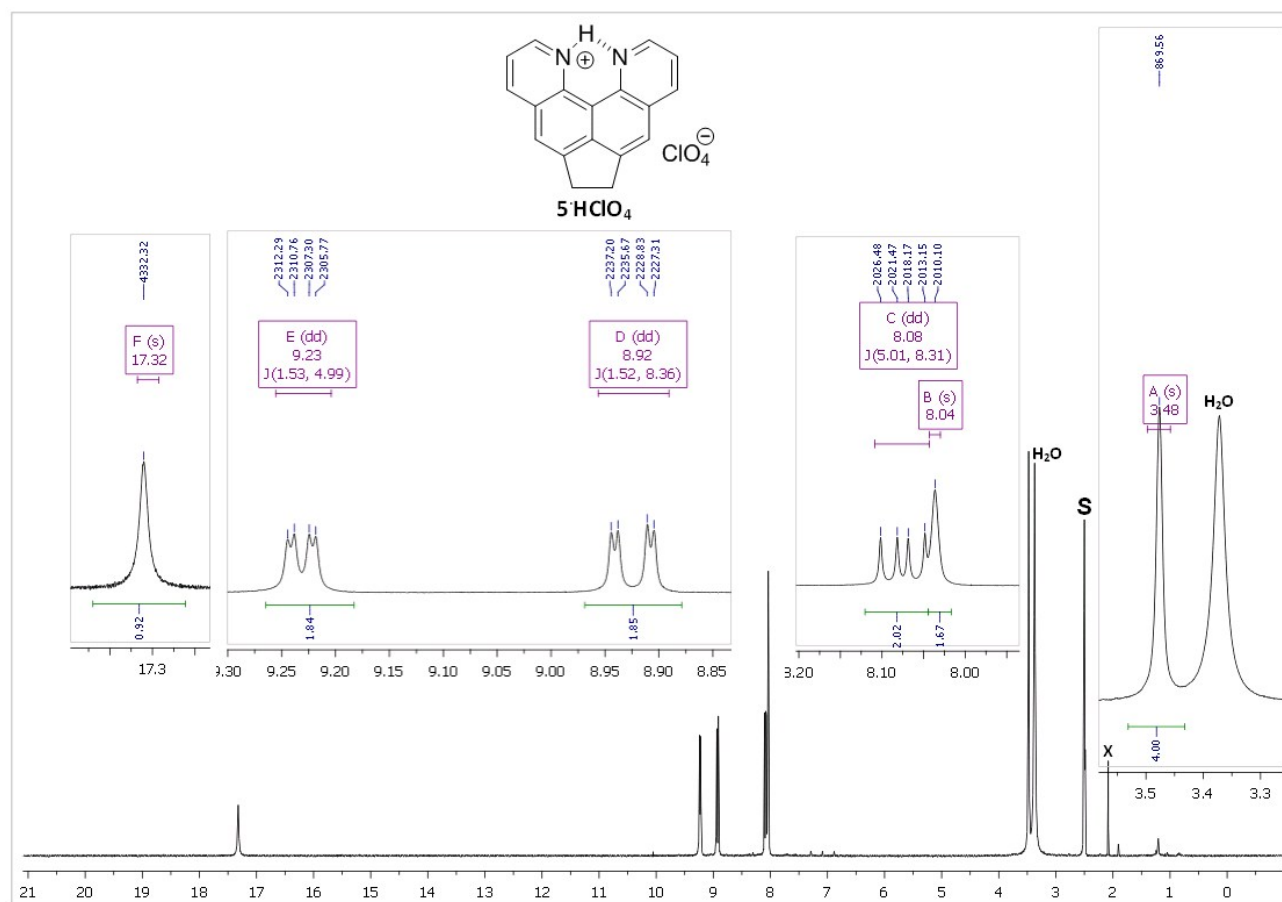

Figure S6.  $^1\text{H}$  NMR spectrum of  $5\text{-HClO}_4$  ( $\text{DMSO-d}_6$ , 250 MHz).

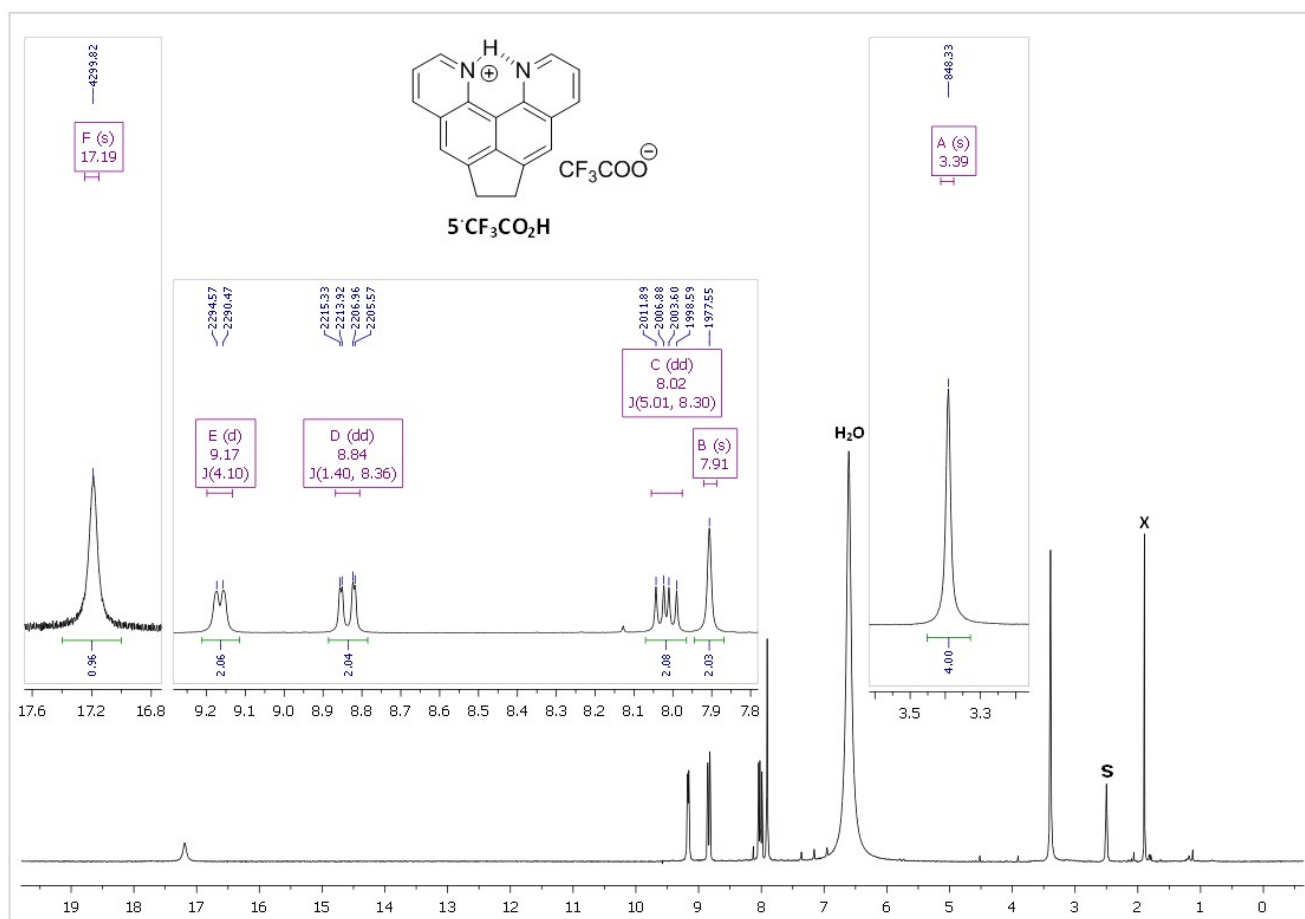

**Figure S7.** <sup>1</sup>H NMR spectrum of **5-CF<sub>3</sub>CO<sub>2</sub>H** (DMSO-d<sub>6</sub>, 250 MHz).

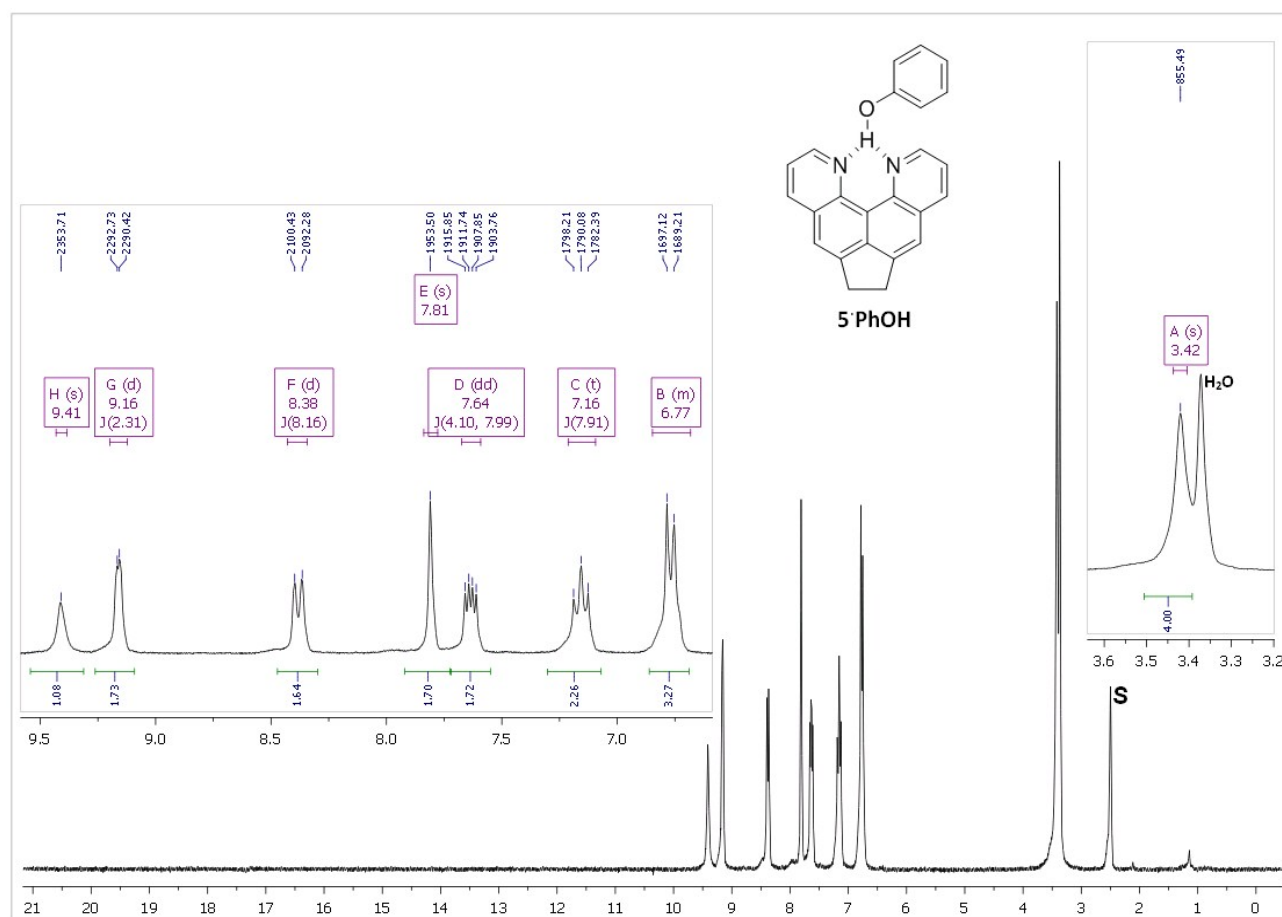

**Figure S8.** <sup>1</sup>H NMR spectrum of **5-PhOH** (DMSO-d<sub>6</sub>, 250 MHz).

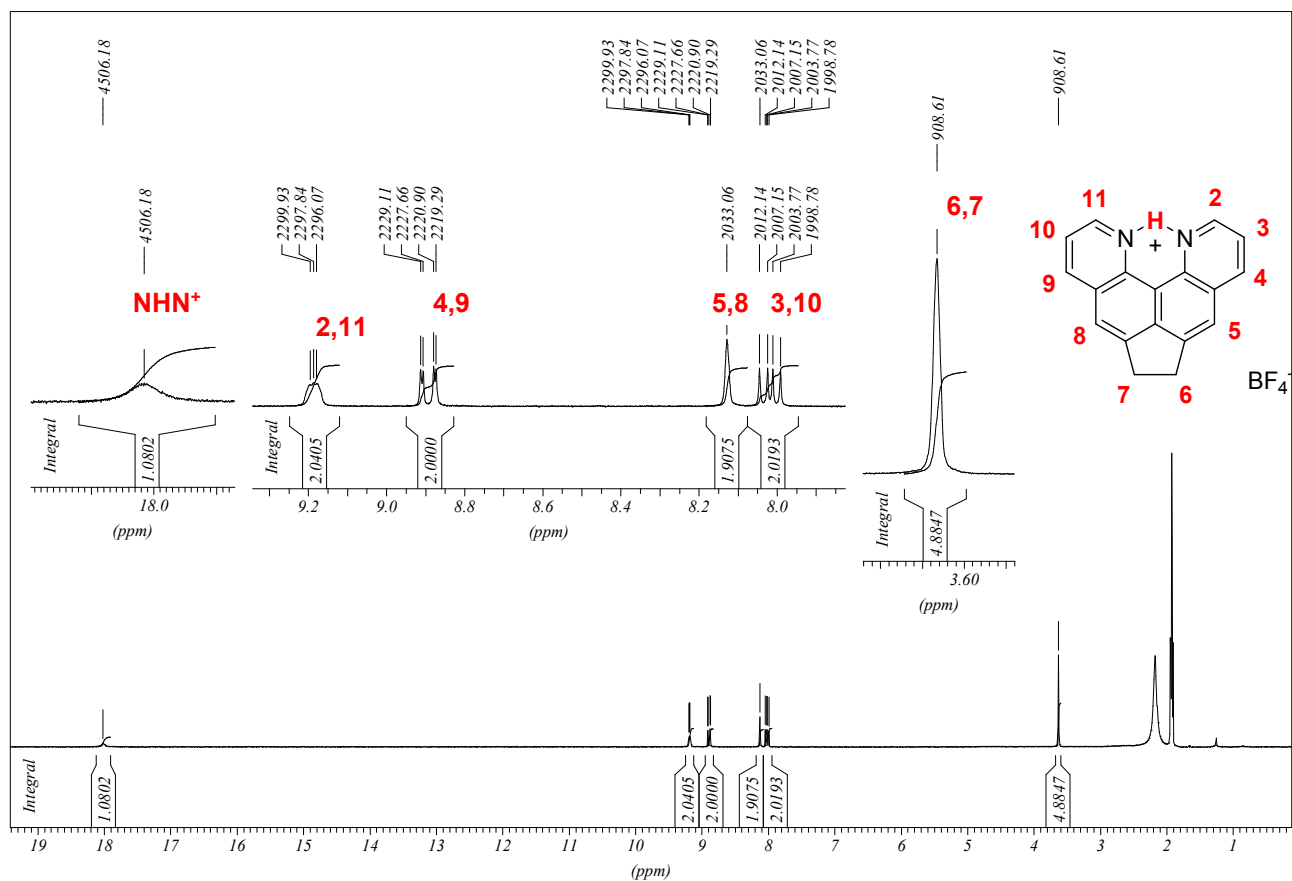

**Figure S9.**  $^1\text{H}$  NMR spectrum of salt  $5\text{H}^+\text{BF}_4^-$  ( $\text{CD}_3\text{CN}$ , 250 MHz).

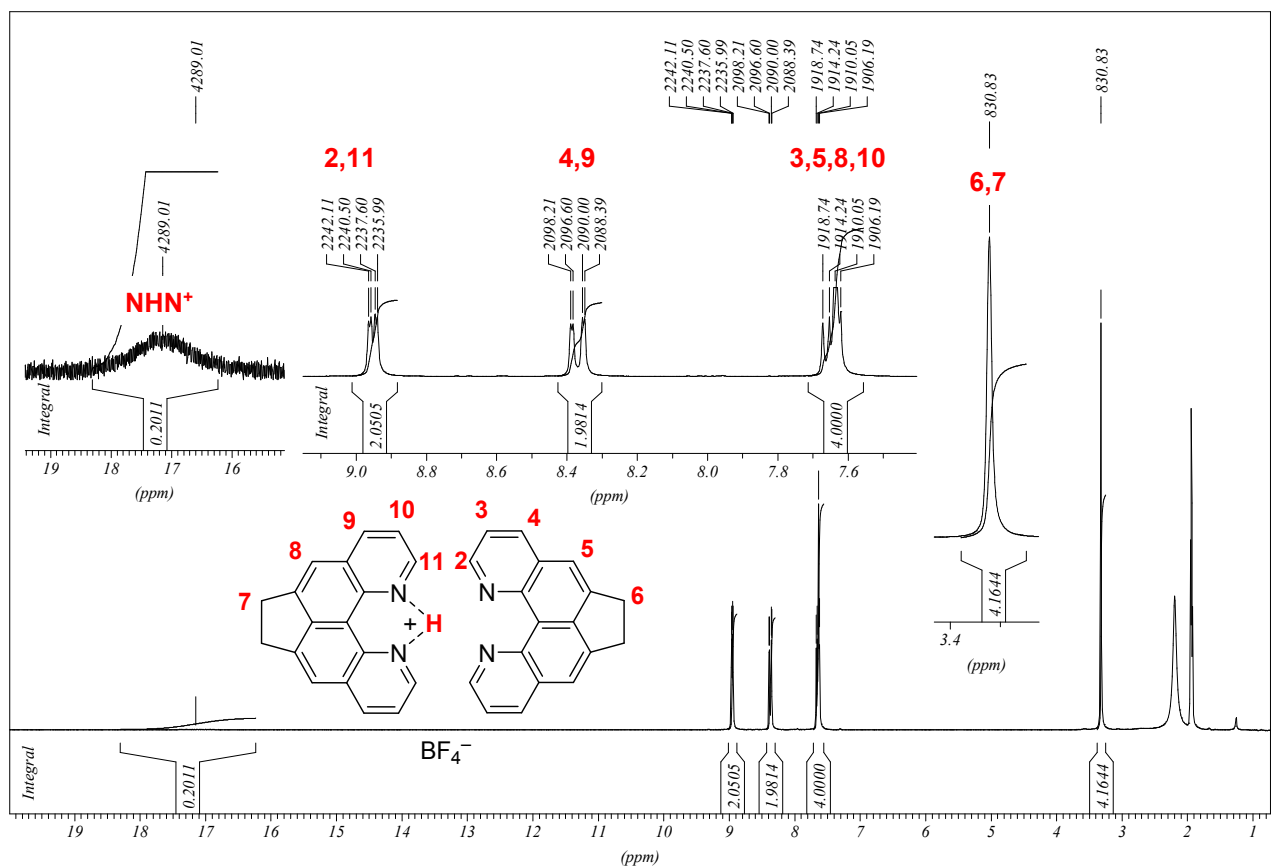

**Figure S10.**  $^1\text{H}$  NMR spectrum of equimolar mixture of base **5** and its tetrafluoroborate  $5\text{H}^+\text{BF}_4^-$  ( $\text{CD}_3\text{CN}$ , 250 MHz).

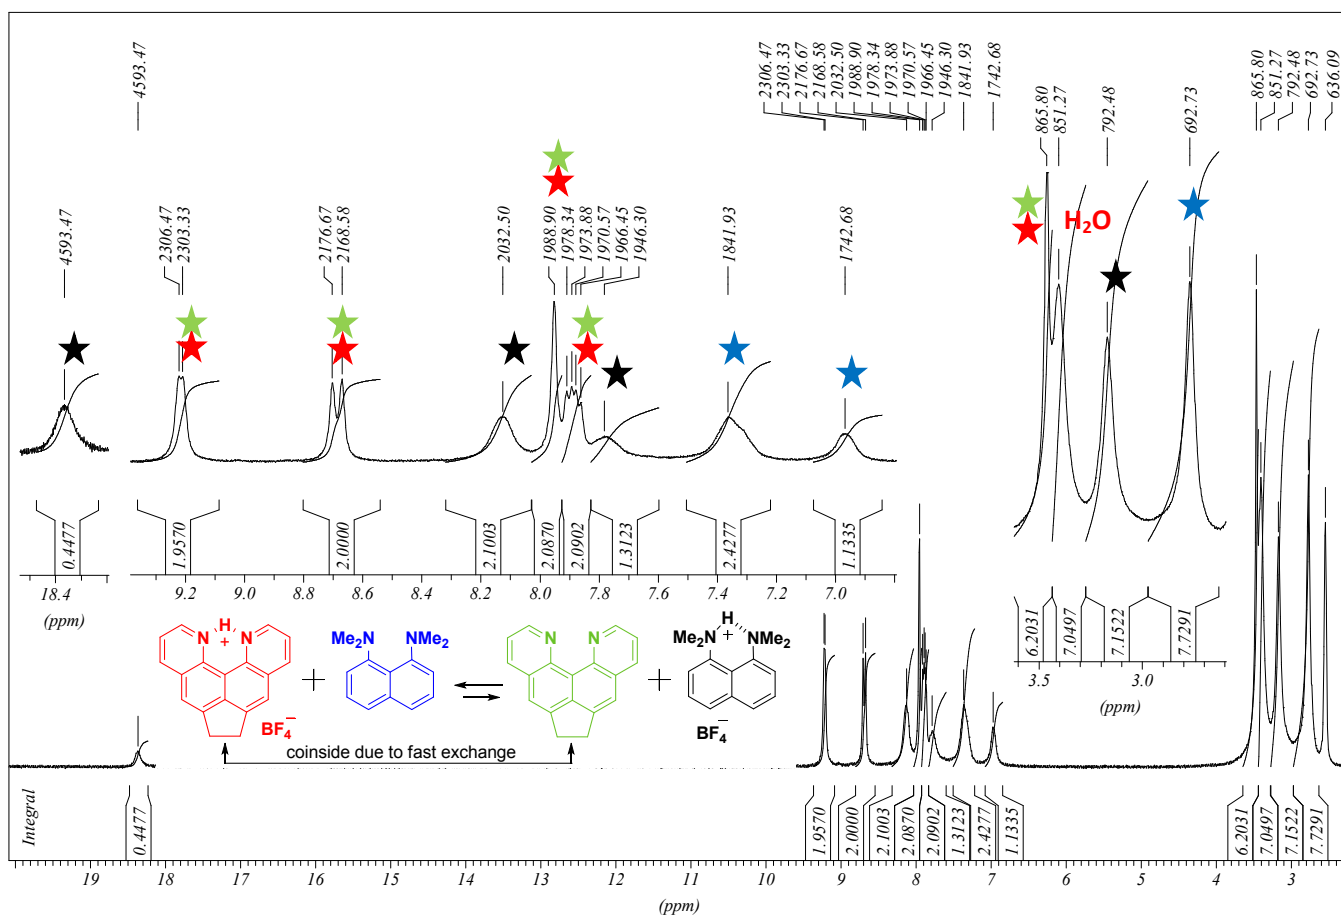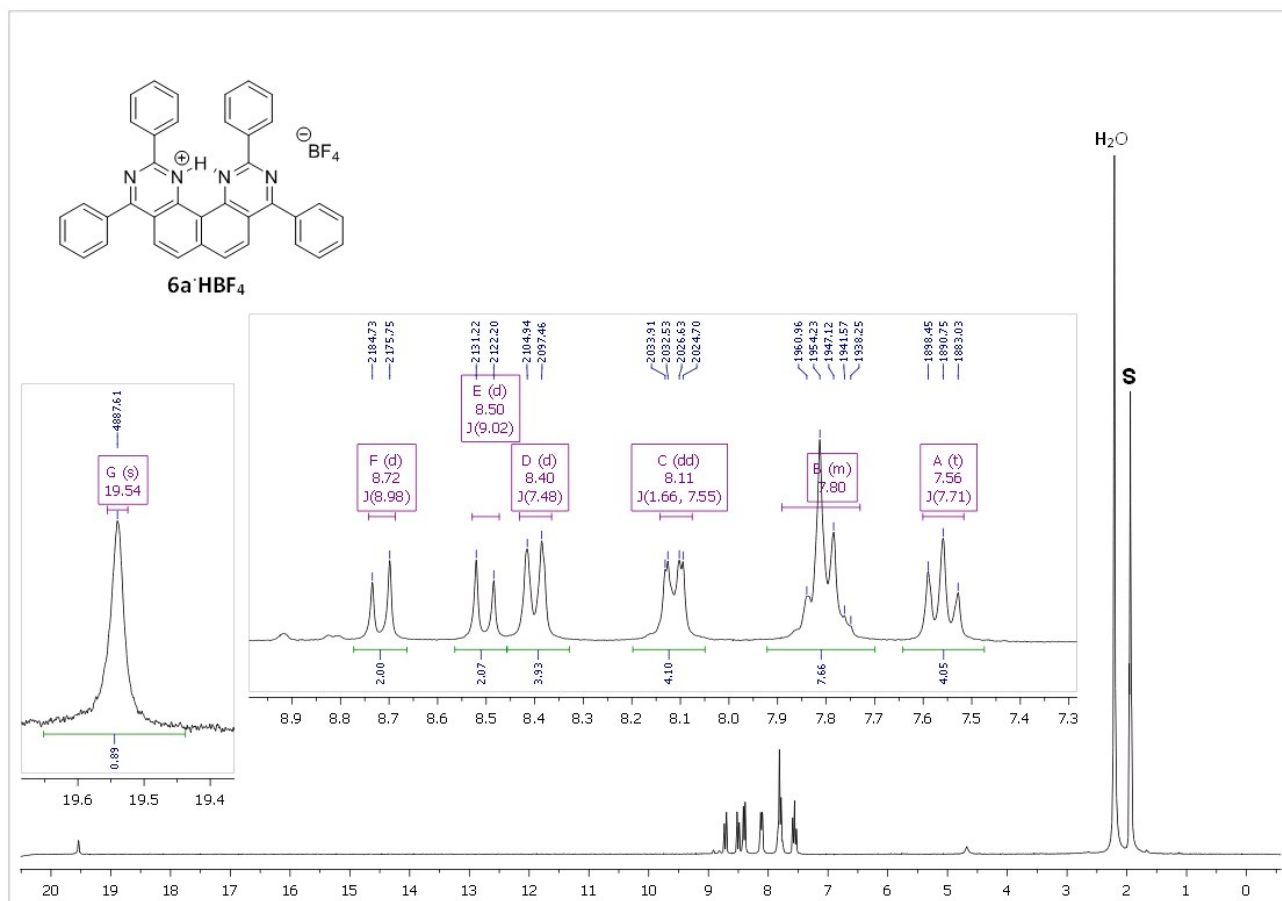

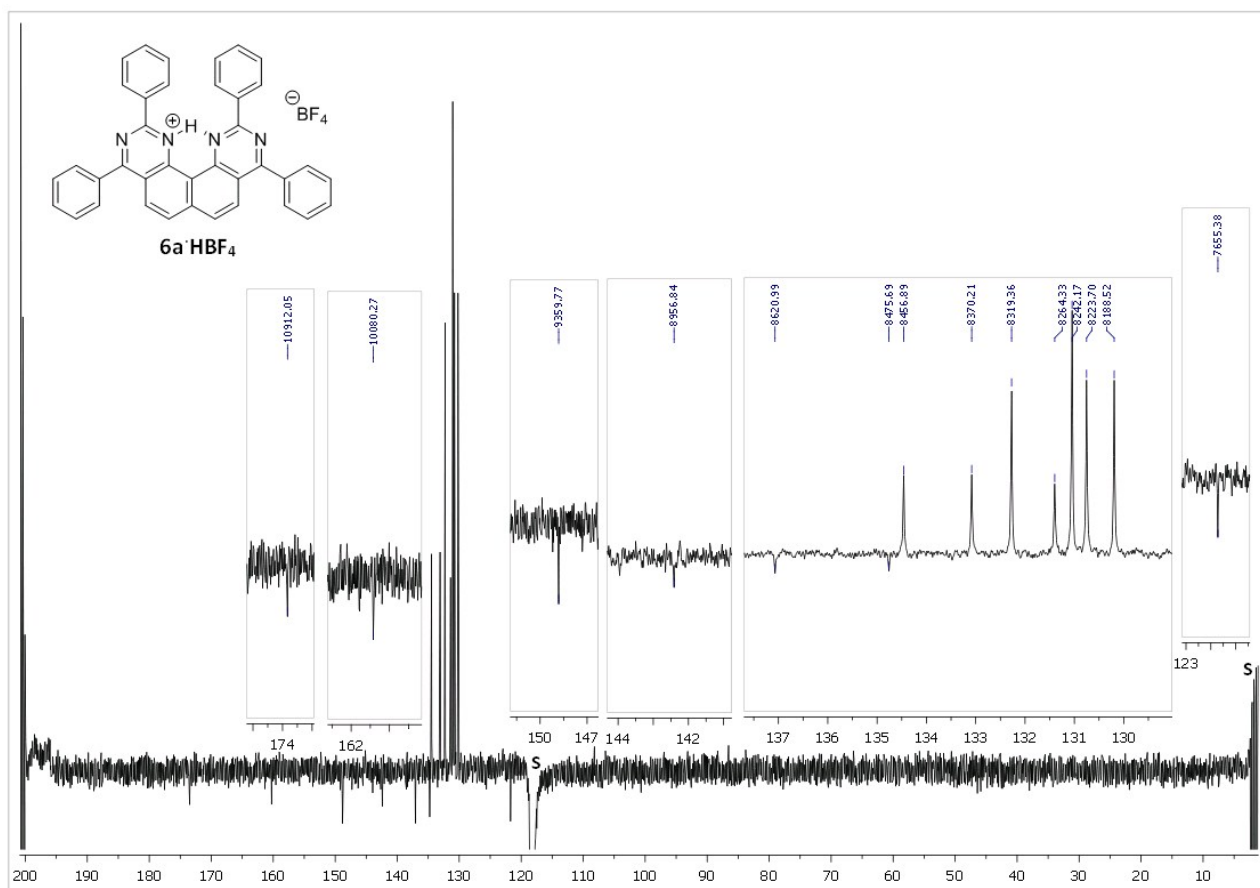

**Figure S13.** <sup>13</sup>C NMR spectrum of **6a·HBF<sub>4</sub>** (CD<sub>3</sub>CN, 63 MHz).

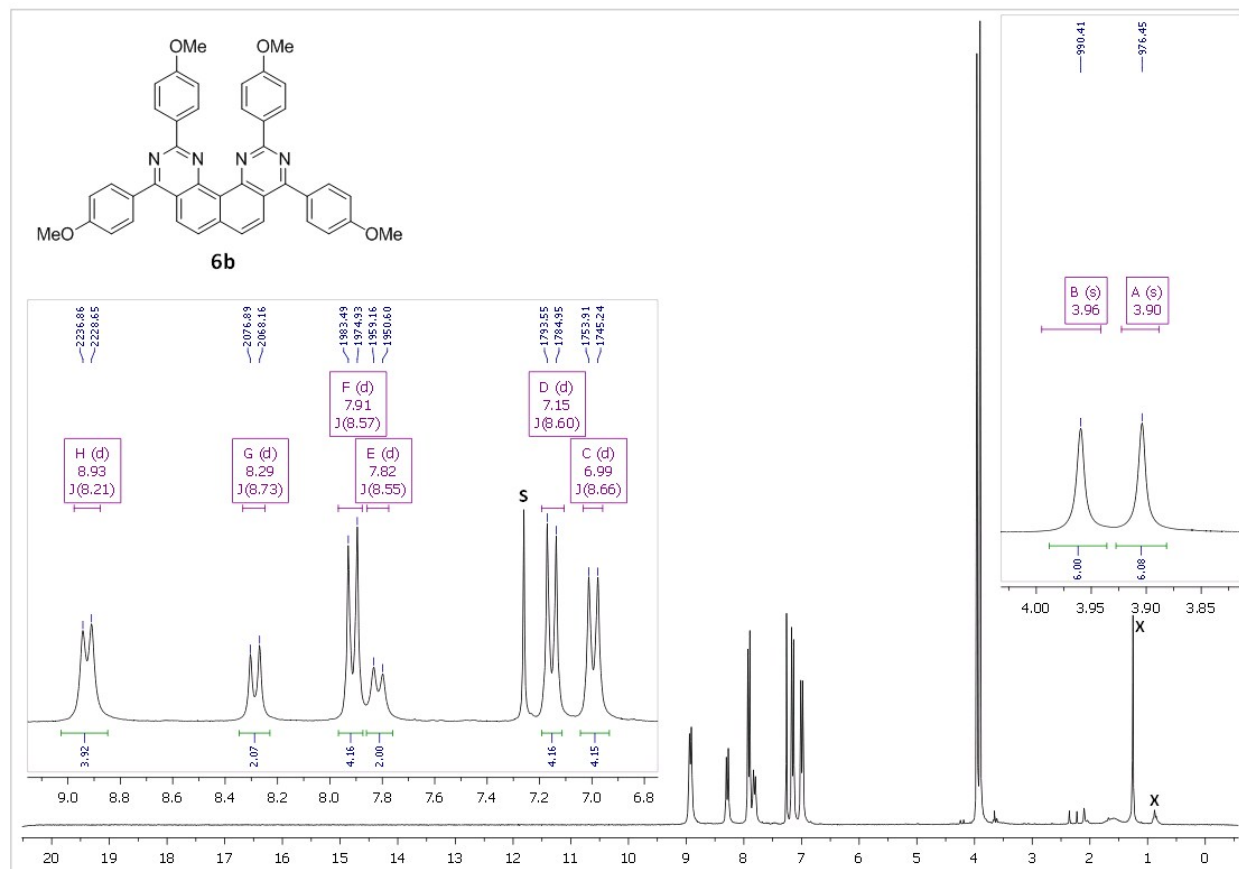

**Figure S14.** <sup>1</sup>H NMR spectrum of **6b** (CDCl<sub>3</sub>, 250 MHz).



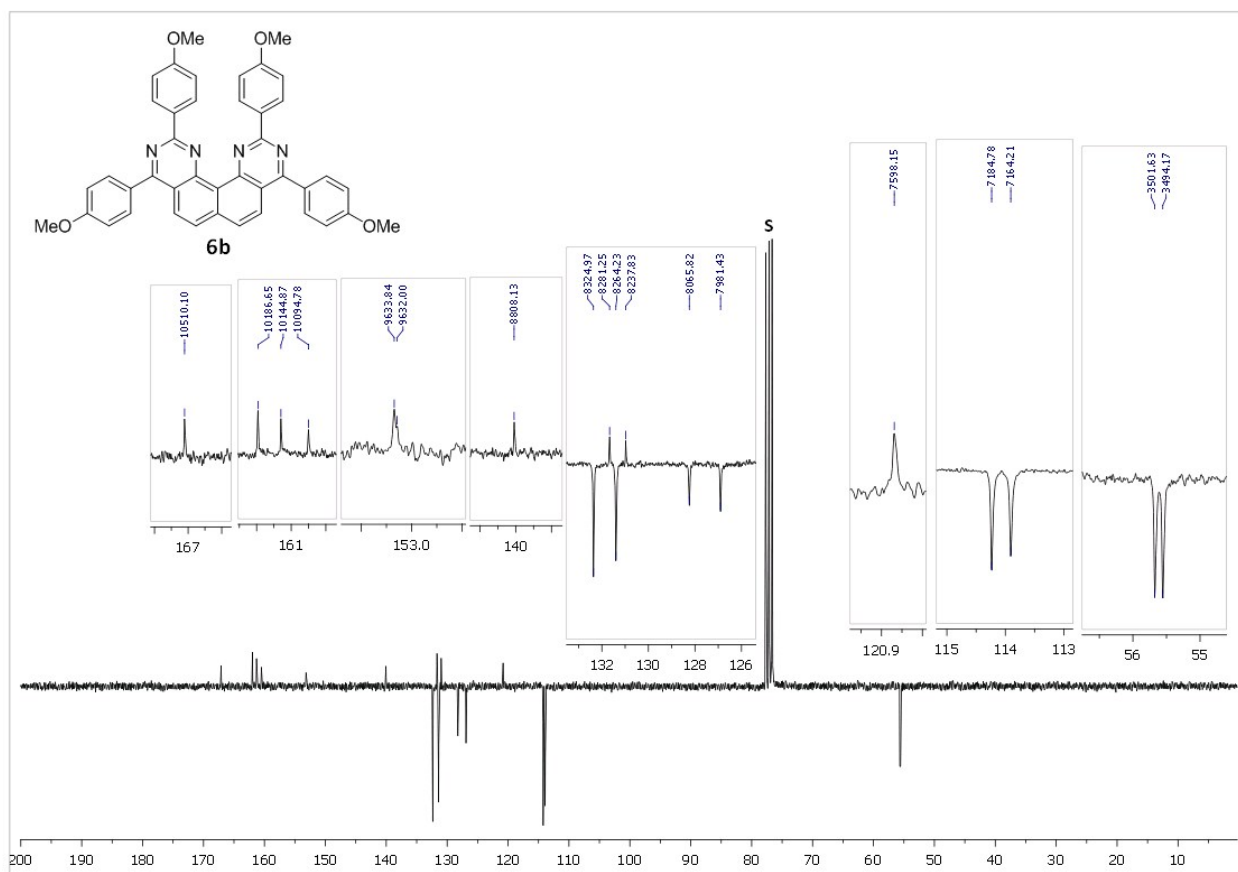

**Figure S15.**  $^{13}\text{C}$  NMR spectrum of **6b** ( $\text{CDCl}_3$ , 63 MHz).

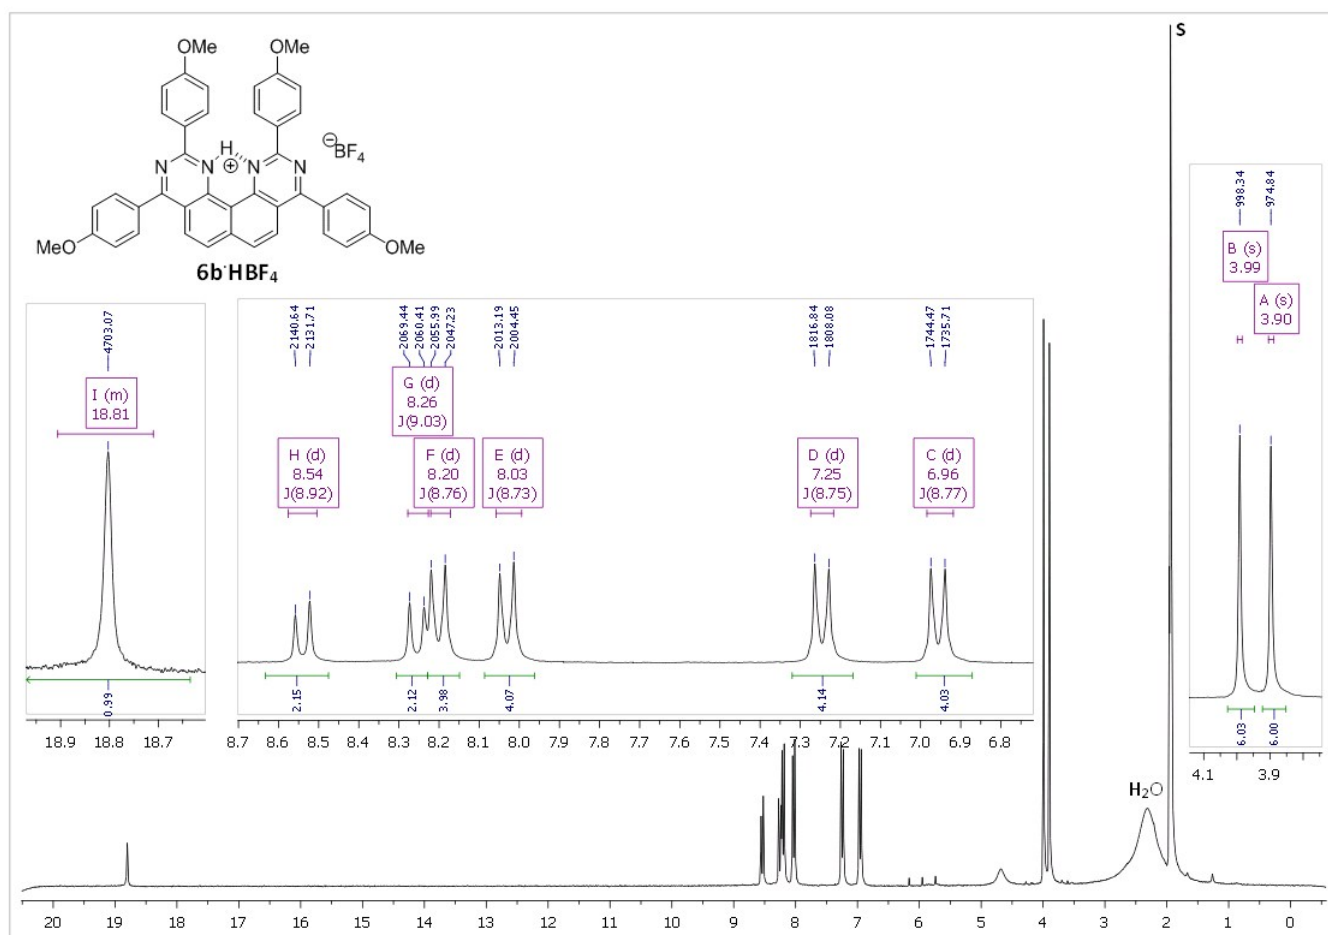

**Figure S16.**  $^1\text{H}$  NMR spectrum of **6b·HBF<sub>4</sub>** ( $\text{CD}_3\text{CN}$ , 250 MHz).

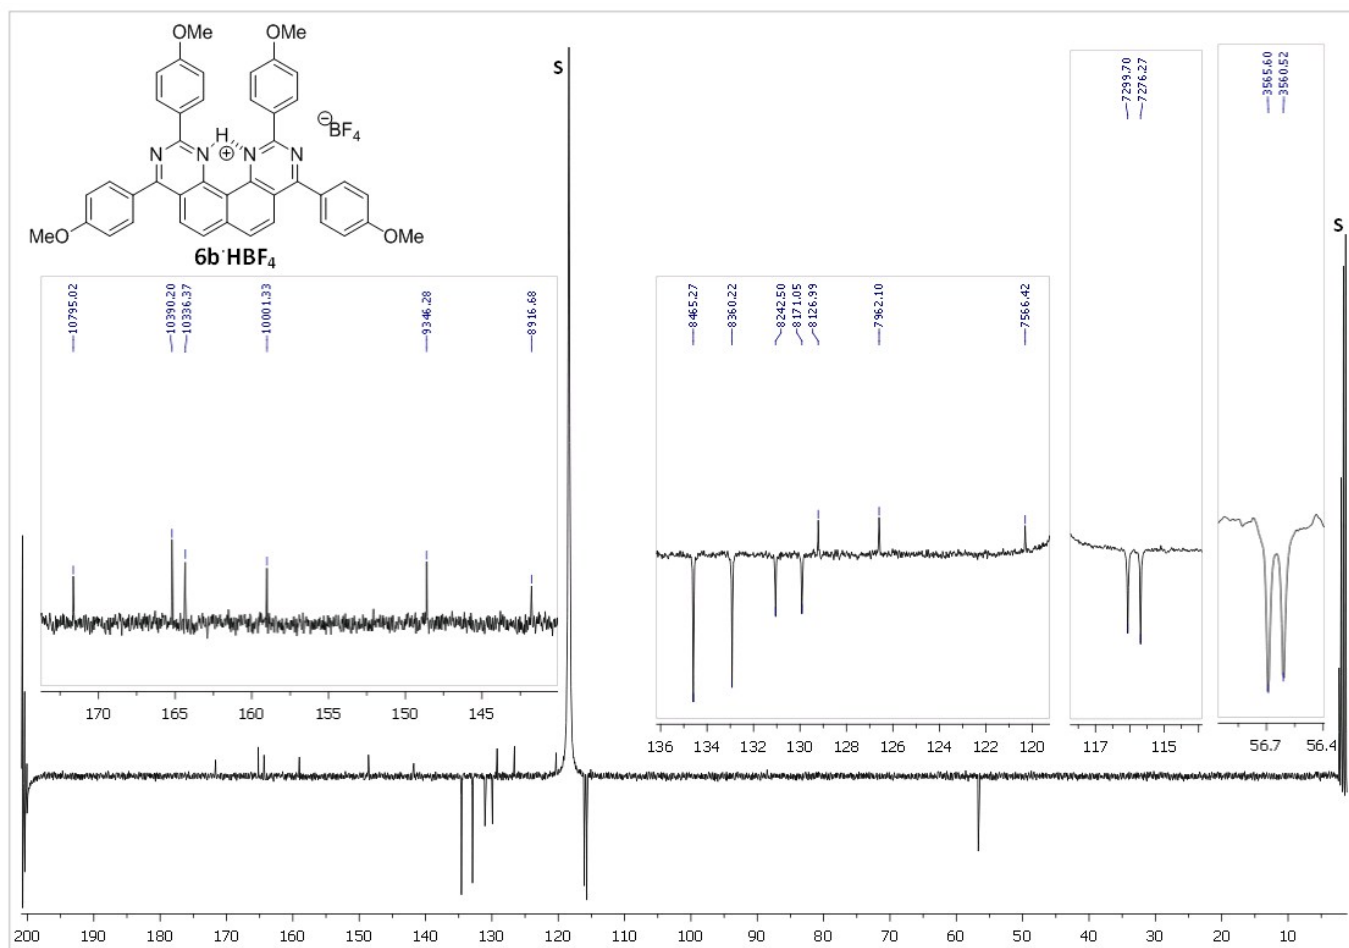

**Figure S17.** <sup>13</sup>C NMR spectrum of **6b·HBF<sub>4</sub>** (CD<sub>3</sub>CN, 63 MHz).

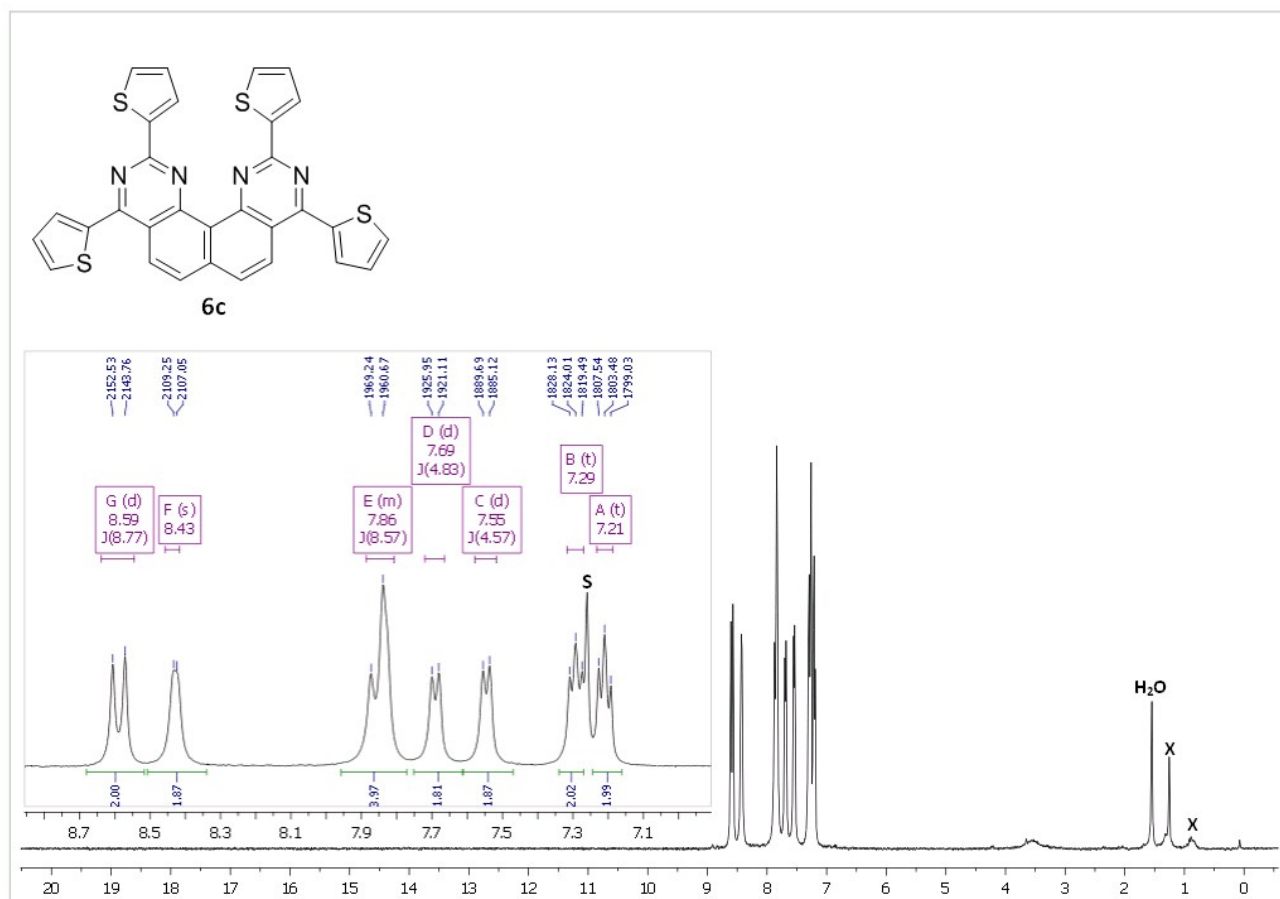

**Figure S18.** <sup>1</sup>H NMR spectrum of **6c** (CDCl<sub>3</sub>, 250 MHz).

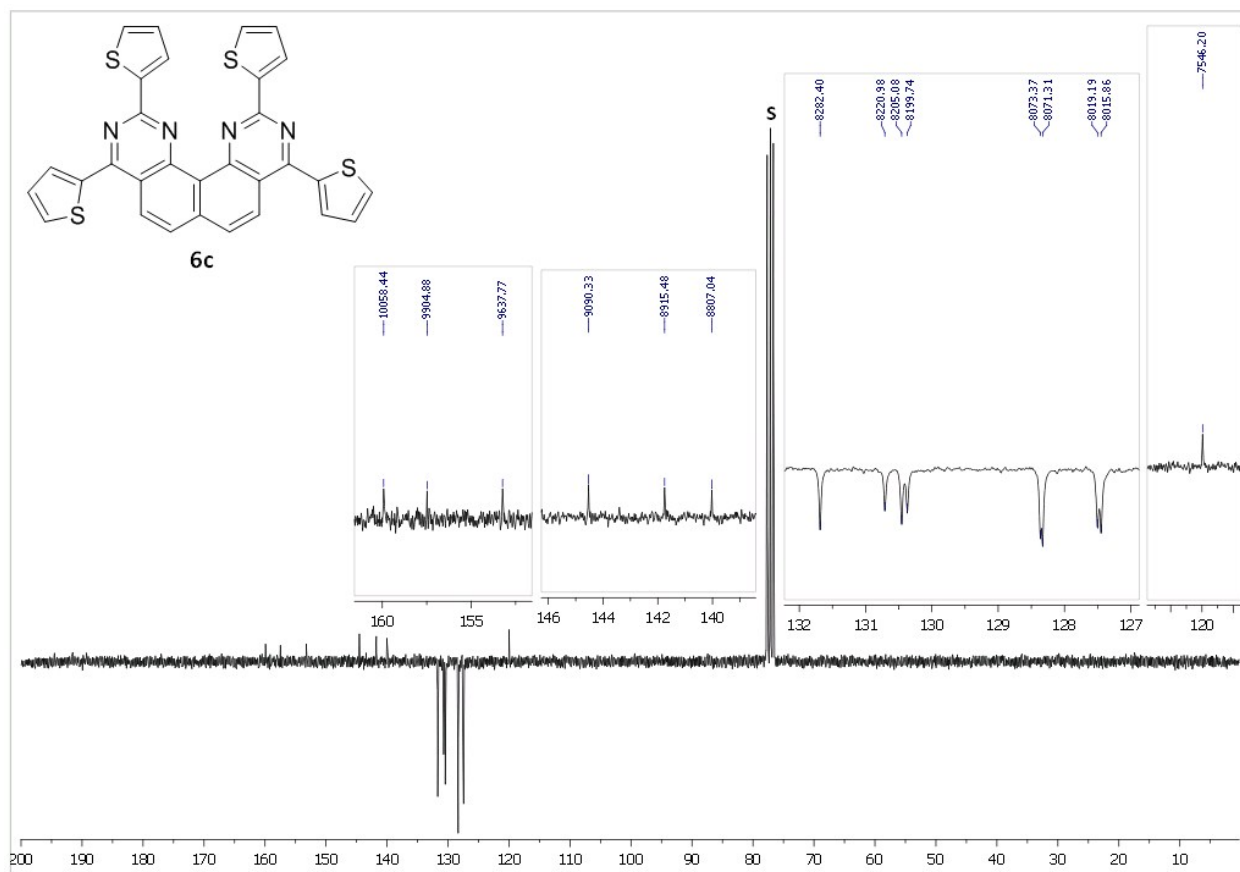

**Figure S19.**  $^{13}\text{C}$  NMR spectrum of **6c** ( $\text{CDCl}_3$ , 63 MHz).

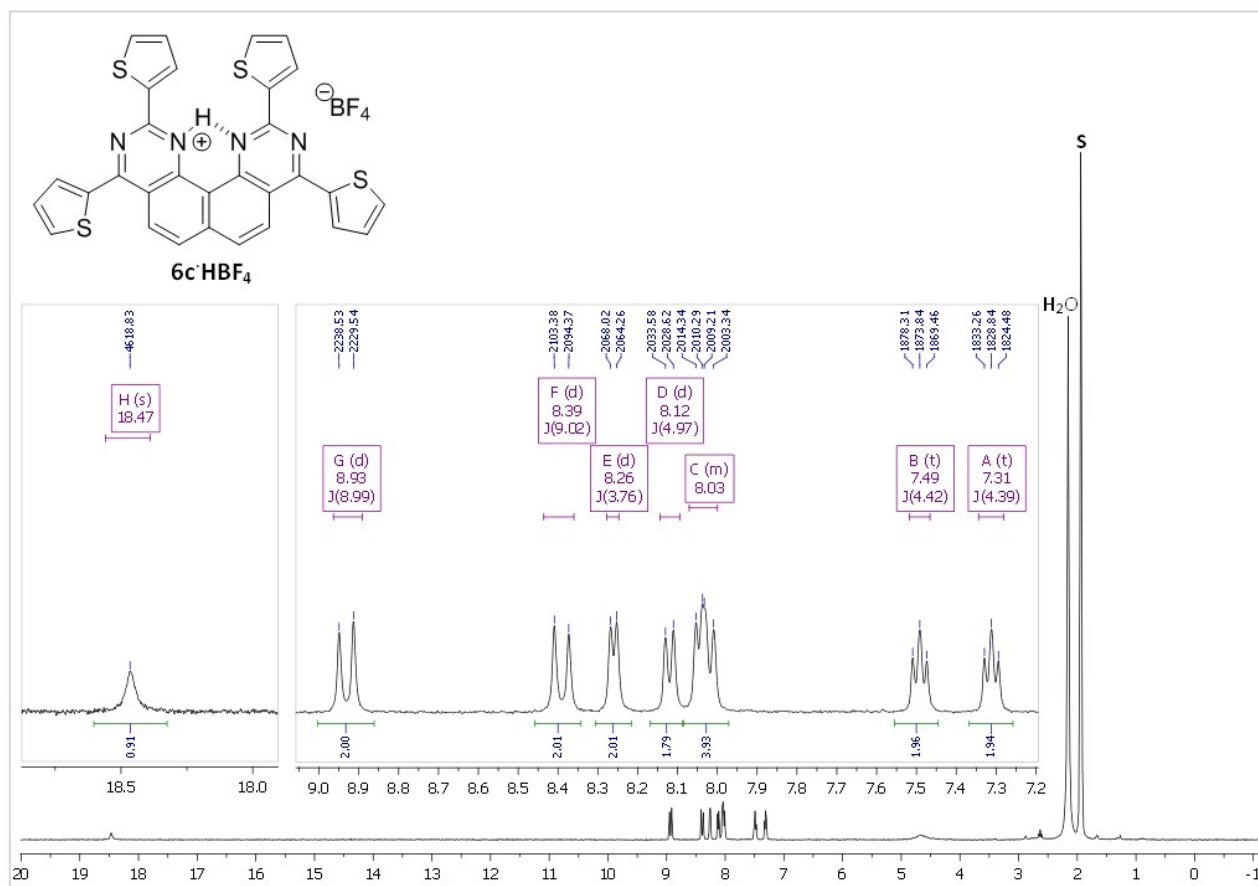

**Figure S20.**  $^1\text{H}$  NMR spectrum of **6c·HBF<sub>4</sub>** ( $\text{CD}_3\text{CN}$ , 250 MHz).

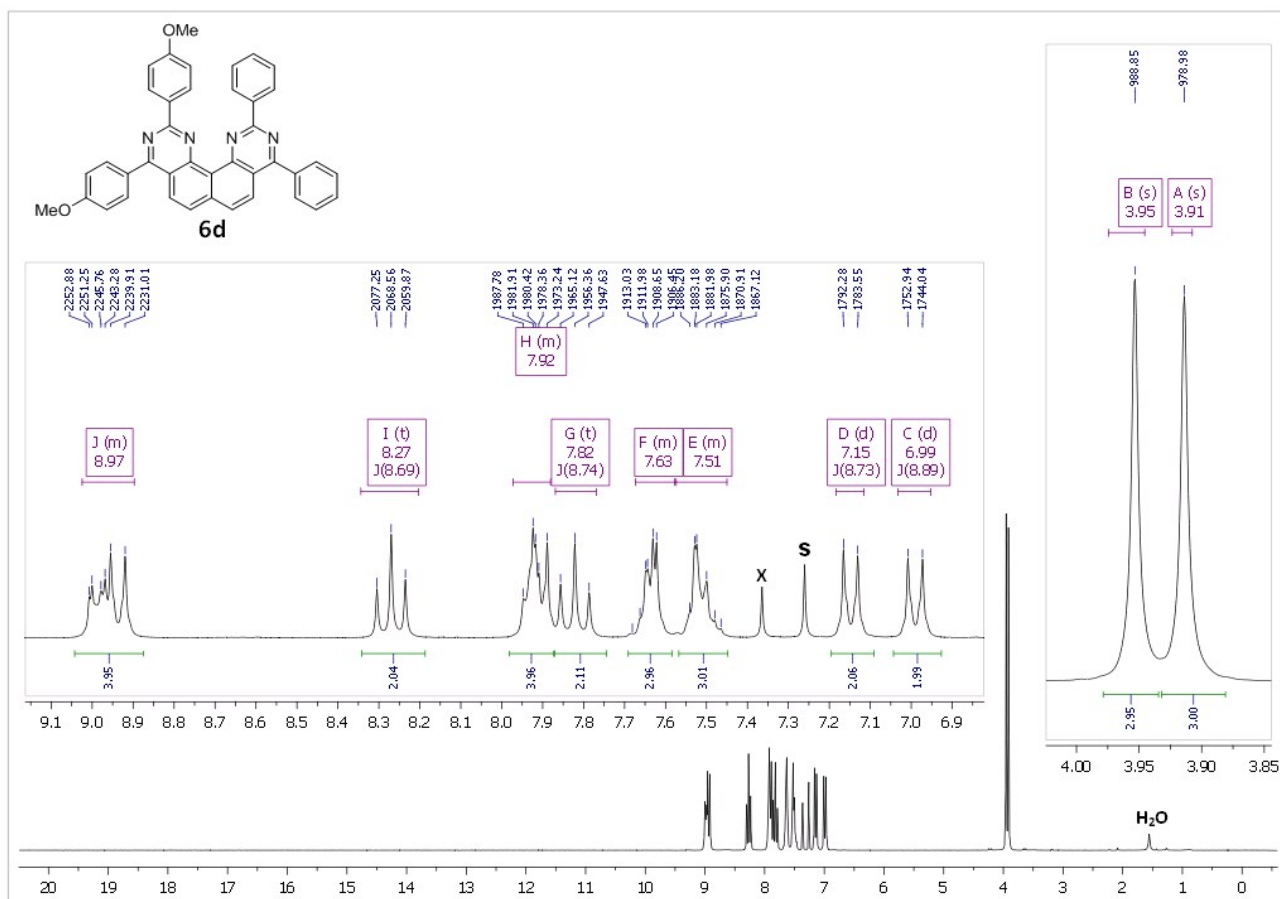

**Figure S21.** <sup>1</sup>H NMR spectrum of **6d** (CDCl<sub>3</sub>, 250 MHz).

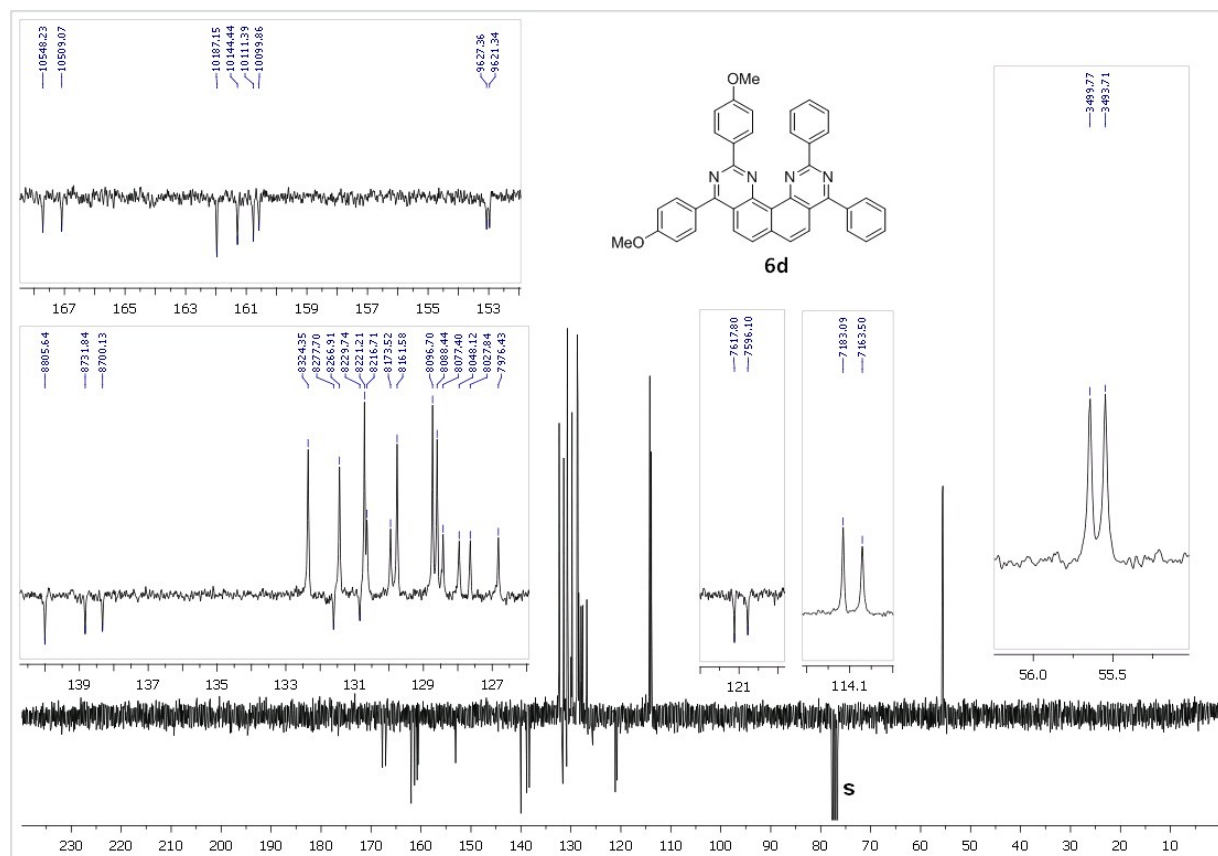

**Figure S22.** <sup>13</sup>C NMR spectrum of **6d** (CDCl<sub>3</sub>, 63 MHz).

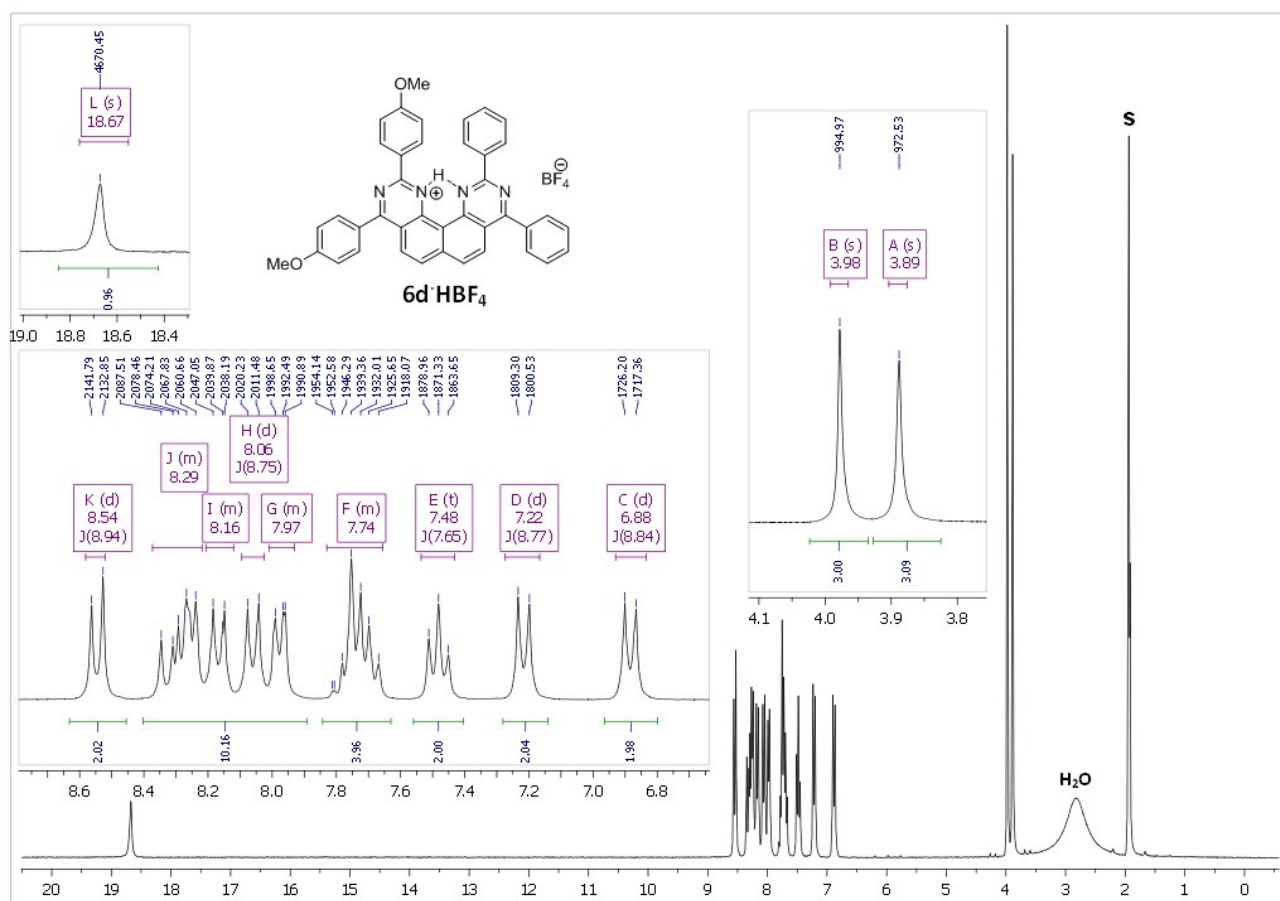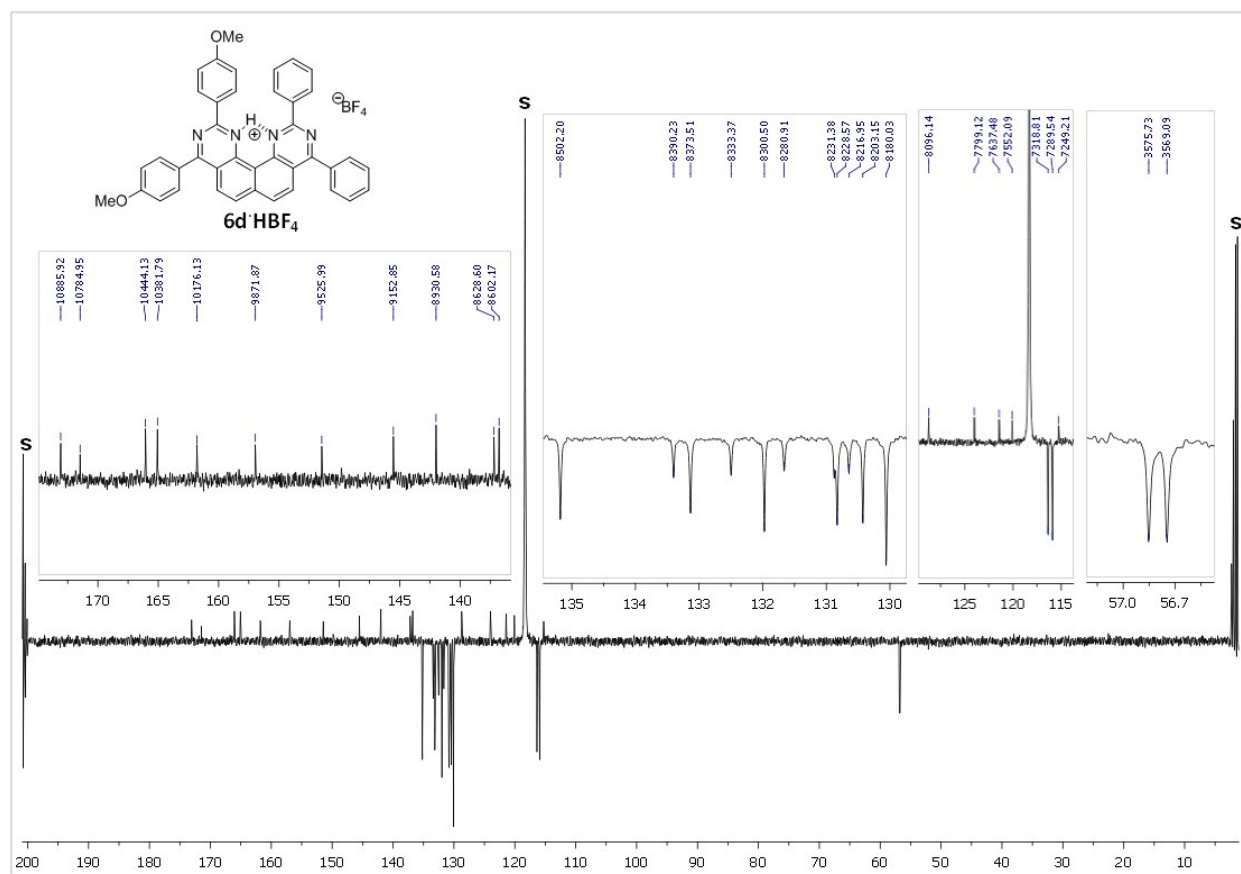

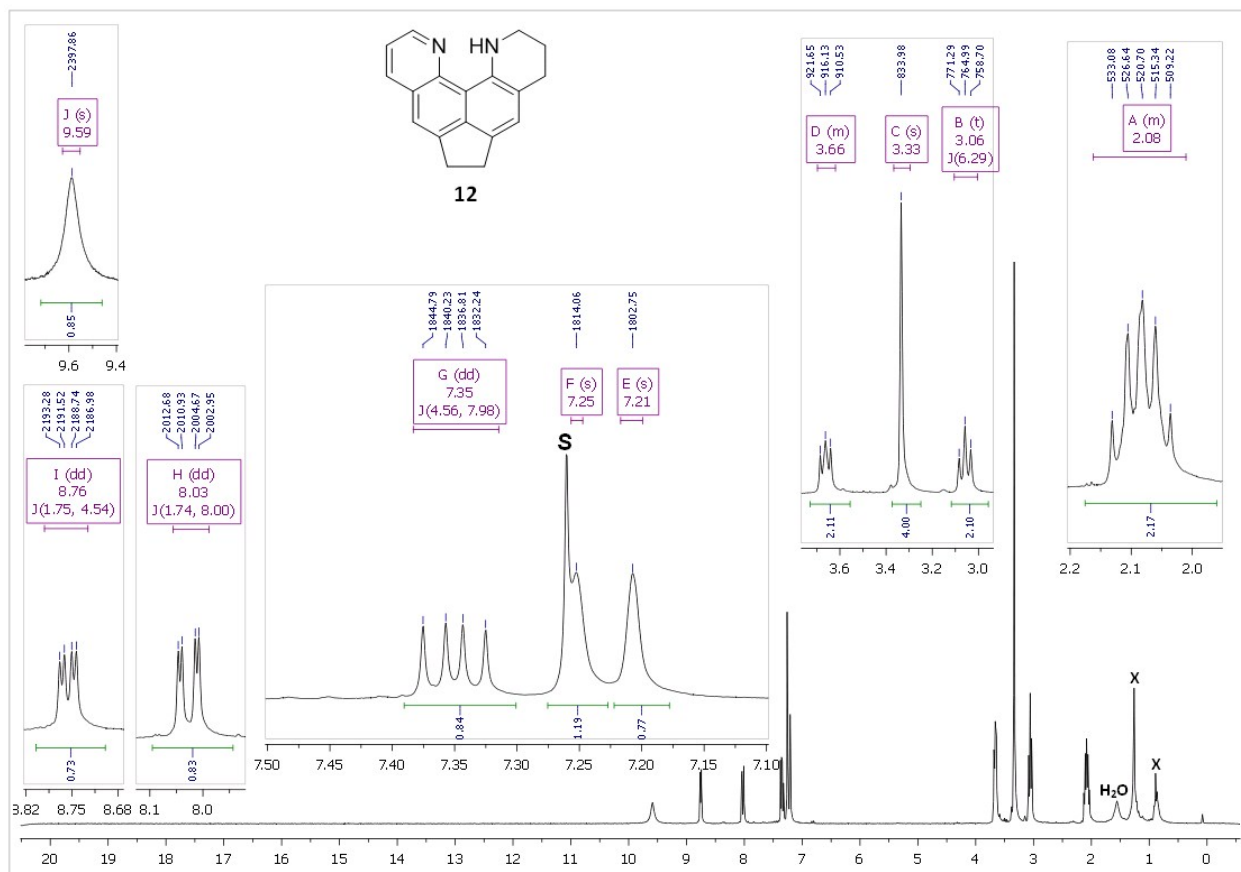

**Figure S25.** <sup>1</sup>H NMR spectrum of **12** (CDCl<sub>3</sub>, 250 MHz).

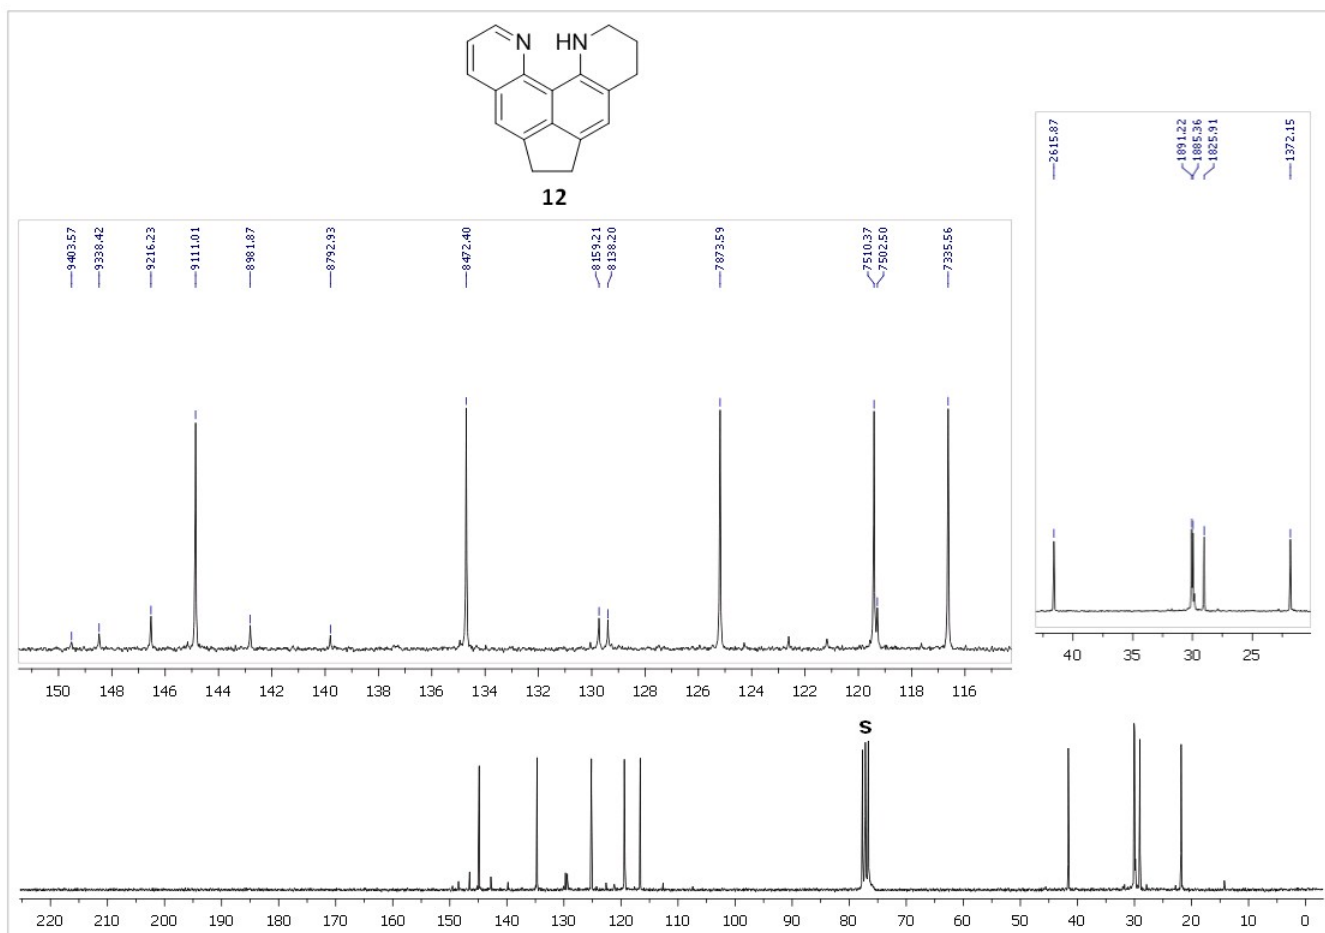

**Figure S26.** <sup>13</sup>C NMR spectrum of **12** (CDCl<sub>3</sub>, 63 MHz).

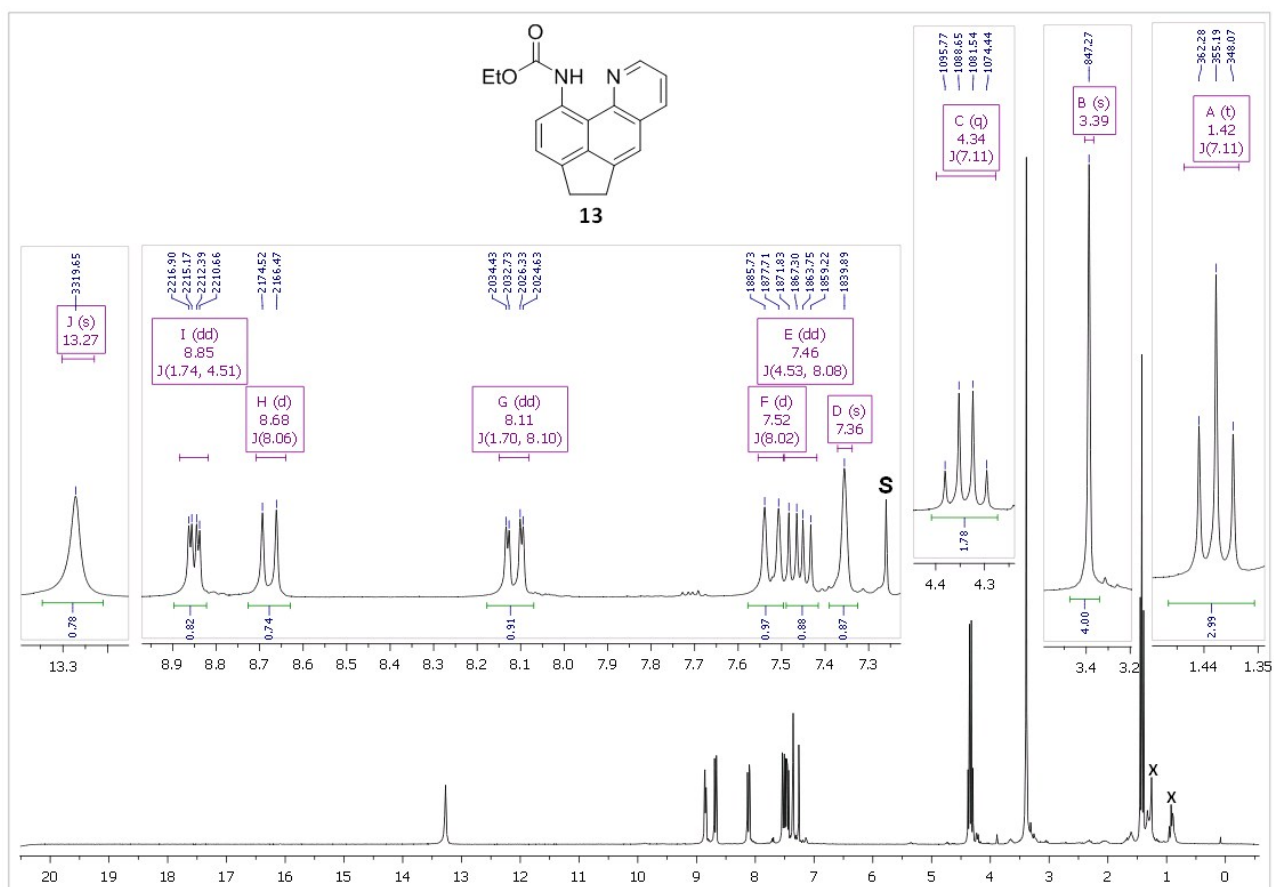

**Figure S27.** <sup>1</sup>H NMR spectrum of **13** (CDCl<sub>3</sub>, 250 MHz).

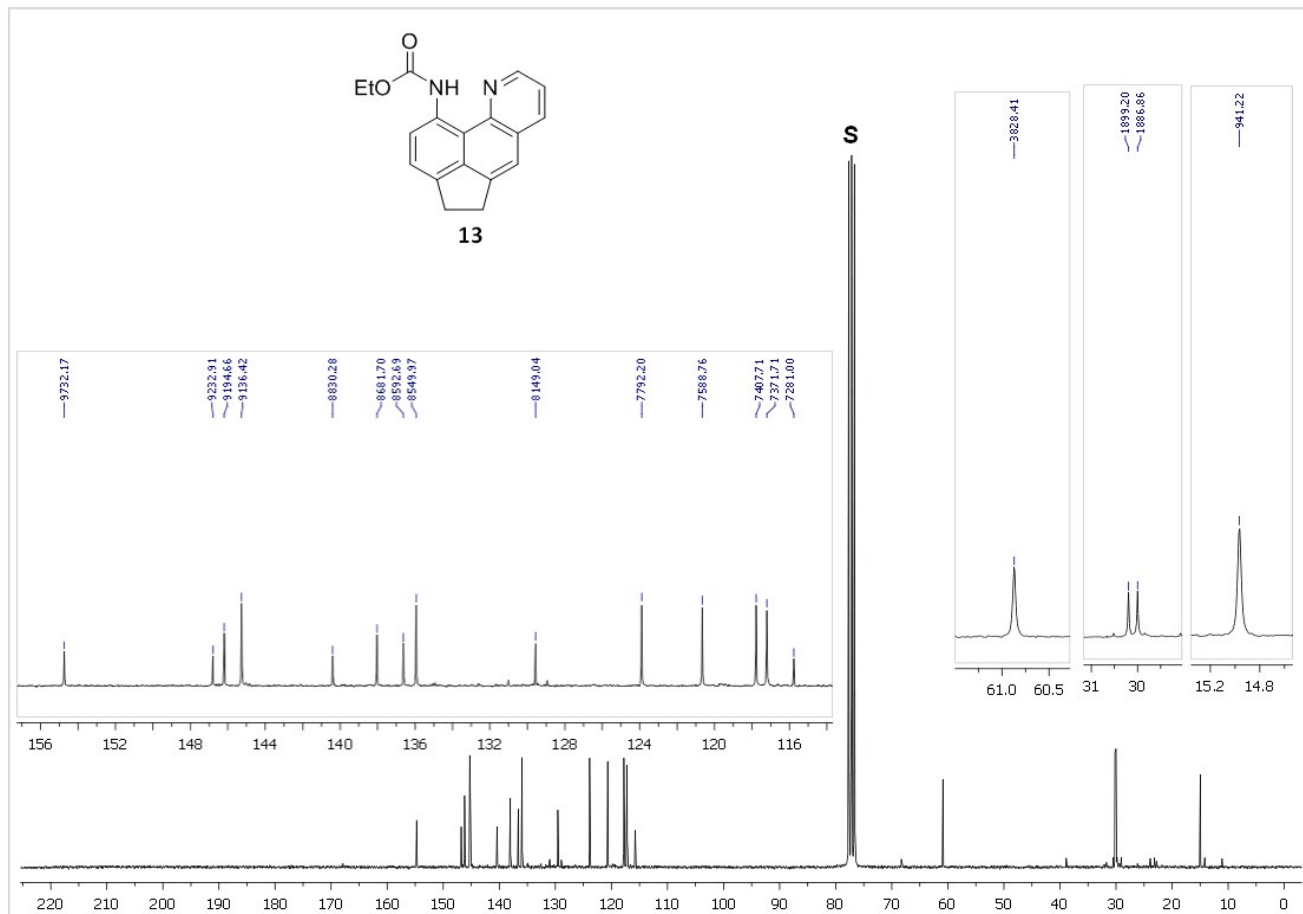

**Figure S28.** <sup>13</sup>C NMR spectrum of **13** (CDCl<sub>3</sub>, 63 MHz).

Gas-phase proton affinities, PA, for **6a** and **3** (R = Ph) (B3LYP/6-311++G\*\*).

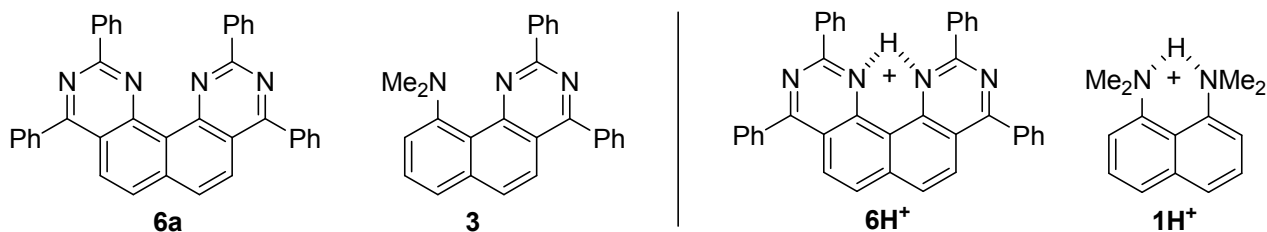

They are equal to 261.65 and 256.62 kcal/mol, respectively (252.93 and 248.16 kcal/mol with ZPE correction). At first glance, these values may seem improbable, since they mean a greater basicity of **6** than the proton sponge **1** (253.40 and 244.79 kcal/mol with ZPE correction). However, one should not forget that in vacuum, i.e. in the absence of solvation, the acid-base properties are strongly influenced by the size of the cation or anion: larger ions, such as **6H<sup>+</sup>** in comparison with **1H<sup>+</sup>**, are better stabilized due to more efficient charge dispersion.



**Table S1.** Selected Absorption and Emission Parameters of the Studied Compounds (in MeCN)

| Compd.         | Absorption<br>$\lambda_{\max}$ , nm<br>( $\epsilon \cdot 10^{-3} \text{ M}^{-1} \text{ cm}^{-1}$ )*              | Emission, $\lambda_{\max}$ ,<br>nm | Stokes shift,<br>nm ( $\text{cm}^{-1}$ ) | Quantum yield   |
|----------------|------------------------------------------------------------------------------------------------------------------|------------------------------------|------------------------------------------|-----------------|
| <b>5</b>       | 378 (14.96)<br>359 (9.68)<br>341 (4.15)<br>318 (4.59)<br>306 (8.43)<br>273 (46.29)<br>245 (25.08)<br>221 (29.51) | -                                  | -                                        | -               |
| <b>5·HClO4</b> | 395 (12.95)<br>374 (9.38)<br>351 (6.22)<br>269 (35.48)<br>243 (28.13)<br>231 (28.58)<br>218 (26.71)              | 426 (427)**                        | 31 (1840)                                | 0.711 (0.299)** |
| <b>6a</b>      | 400, 380, 329,<br>292, 258                                                                                       | -                                  | -                                        | -               |
| <b>6b</b>      | 415 (15.36)<br>394 (12.32)<br>309 (38.80)<br>271 (32.43)<br>258 (36.32)                                          | -                                  | -                                        | -               |
| <b>6c</b>      | 433, 409, 320<br>274, 226                                                                                        | -                                  | -                                        | -               |
| <b>6d</b>      | 409, 389, 307<br>291, 268, 253                                                                                   | -                                  | -                                        | -               |
| <b>6a·HBF4</b> | 430 (22.89)<br>407 (17.54)<br>304 (44.76)<br>255 (44.35)                                                         | 486                                | 56 (1744)                                | 0.773           |
| <b>6b·HBF4</b> | 456 (21.40)<br>432 (15.86)<br>383 (19.99)<br>320 (24.40)<br>289 (22.70)<br>265 (29.39)<br>220 (28.30)            | 558                                | 102 (2167)                               | 0.018           |
| <b>6c·HBF4</b> | 475 (35.12)<br>448 (25.25)<br>382 (24.30)<br>351 (34.70)<br>326 (36.56)<br>273 (34.00)<br>222 (28.65)            | 555                                | 80 (2042)                                | 0.185           |
| <b>6d·HBF4</b> | 446 (33.37)<br>421 (25.80)<br>391 (24.62)<br>303 (34.74)<br>263 (46.15)                                          | 593                                | 147 (2028)                               | 0.007           |

\*Due to low solubility exact values of extinction for bases **6a**, **6c** and **6d** could not be measured.

\*\* The values found in water are given in parentheses.

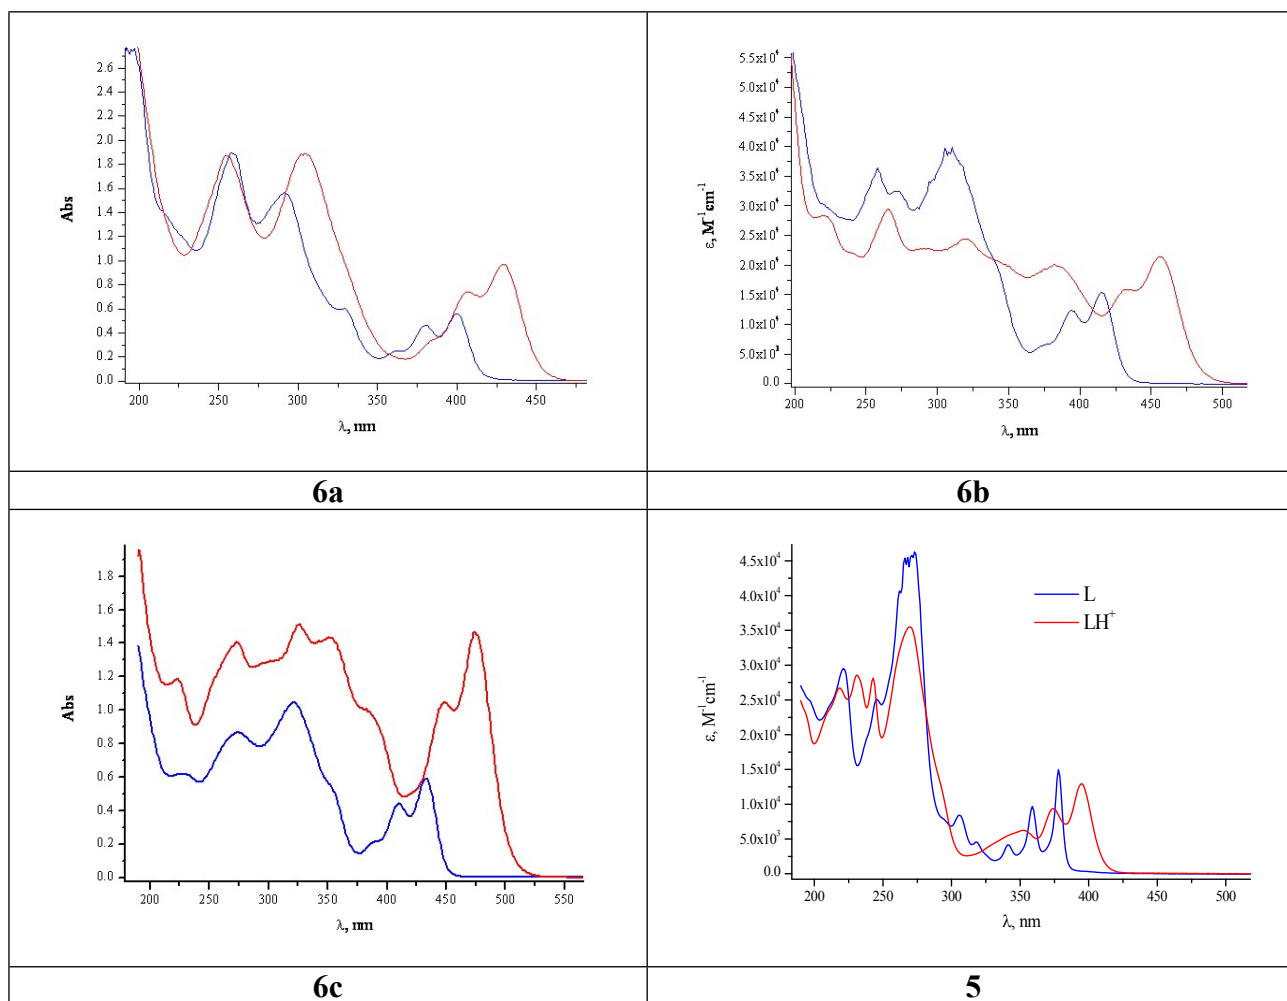

**Figure S29.** Absorption spectra of compounds **5** and **6a–c** (blue) and their salts **5H<sup>+</sup>ClO<sub>4</sub><sup>-</sup>** and **6H<sup>+</sup>BF<sub>4</sub><sup>-</sup>** (red) in MeCN.

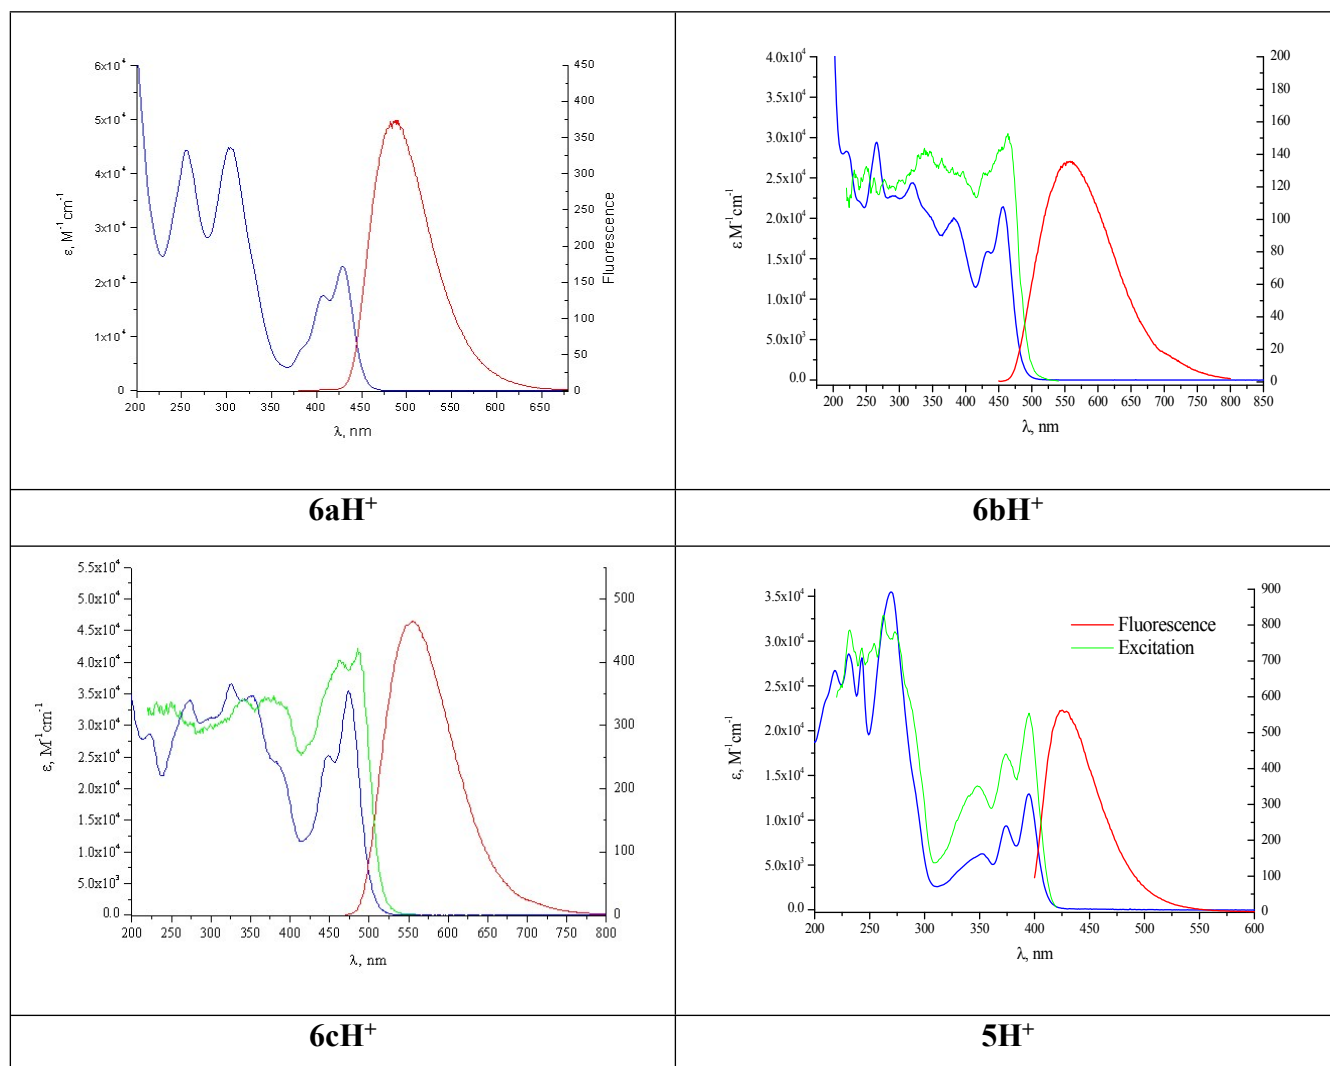

**Figure S30.** Absorption (blue), excitation (green) and emission (red) spectra for salts **6a–c·HBF<sub>4</sub>** and **5·HClO<sub>4</sub>** in MeCN.

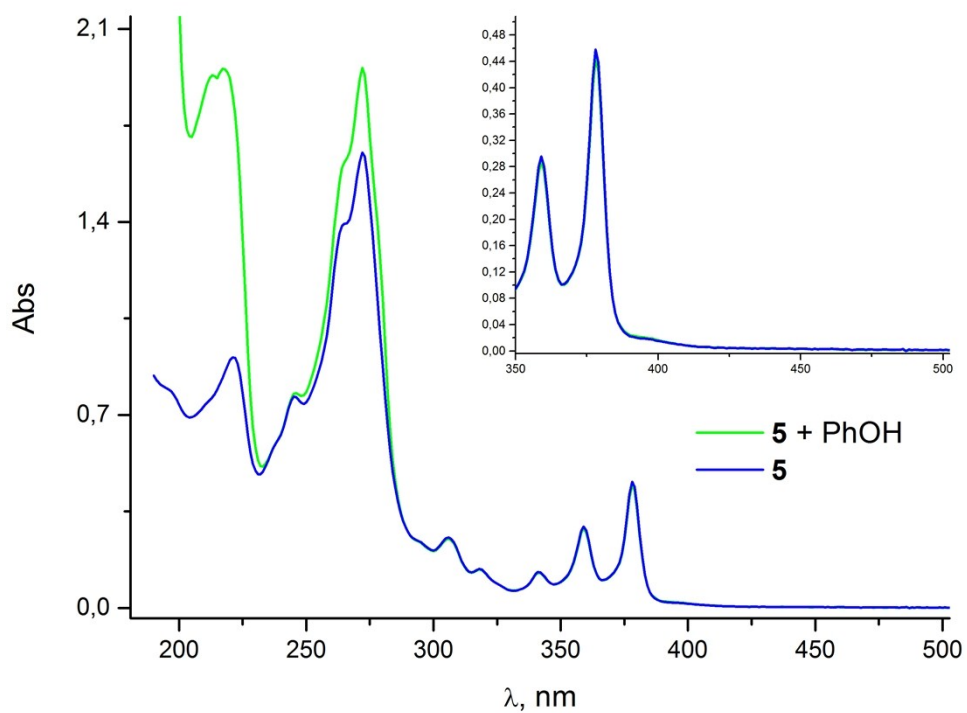

**Figure S31.** Absorption spectrum of base **5** in acetonitrile in the absence and in the presence of phenol,  $c(\mathbf{5}) = 3.47 \cdot 10^{-5}$  M,  $c(\text{PhOH}) = 2.4 \cdot 10^{-4}$  M.

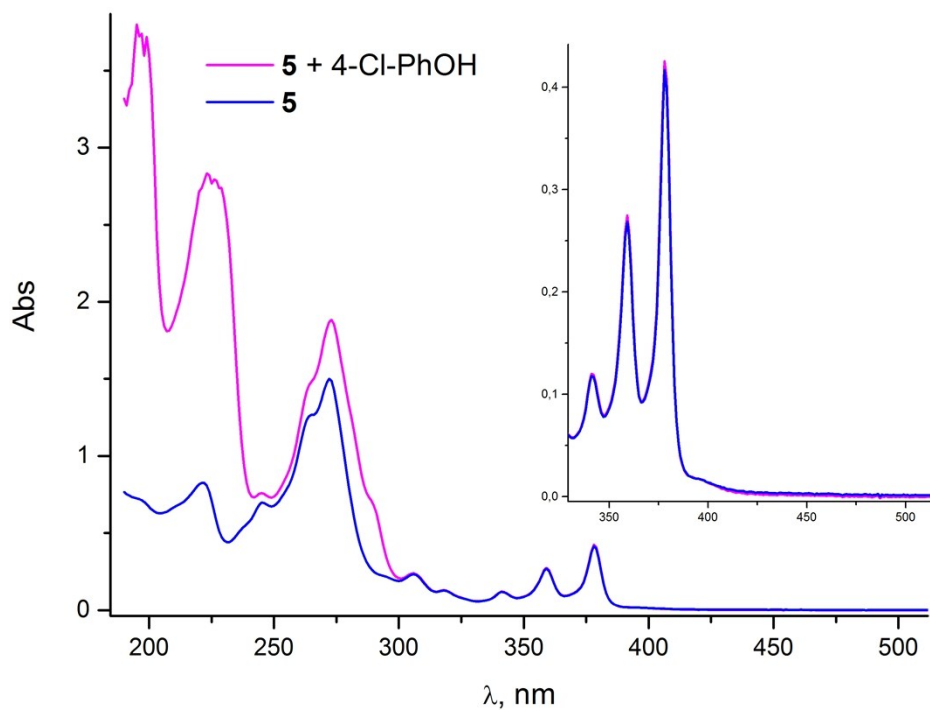

**Figure S32.** Absorption spectrum of base **5** in acetonitrile in the absence and in the presence of 4-chlorophenol,  $c(\mathbf{5}) = 3.47 \cdot 10^{-5}$  M,  $c(4\text{-Cl-C}_6\text{H}_4\text{OH}) = 2.9 \cdot 10^{-4}$  M.

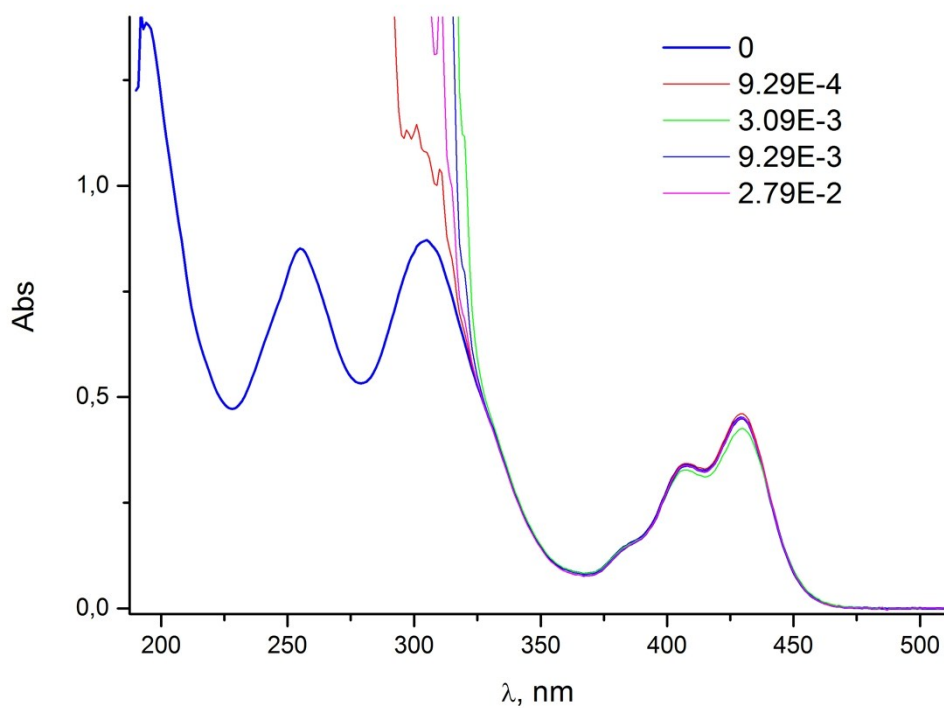

**Figure S33.** Absorption spectra of salt  $6aH^+ClO_4^-$  in acetonitrile ( $c = 2 \cdot 10^{-5} \text{ M}$ ) in the presence of naphthalene. The concentrations of naphthalene are presented on the panel.

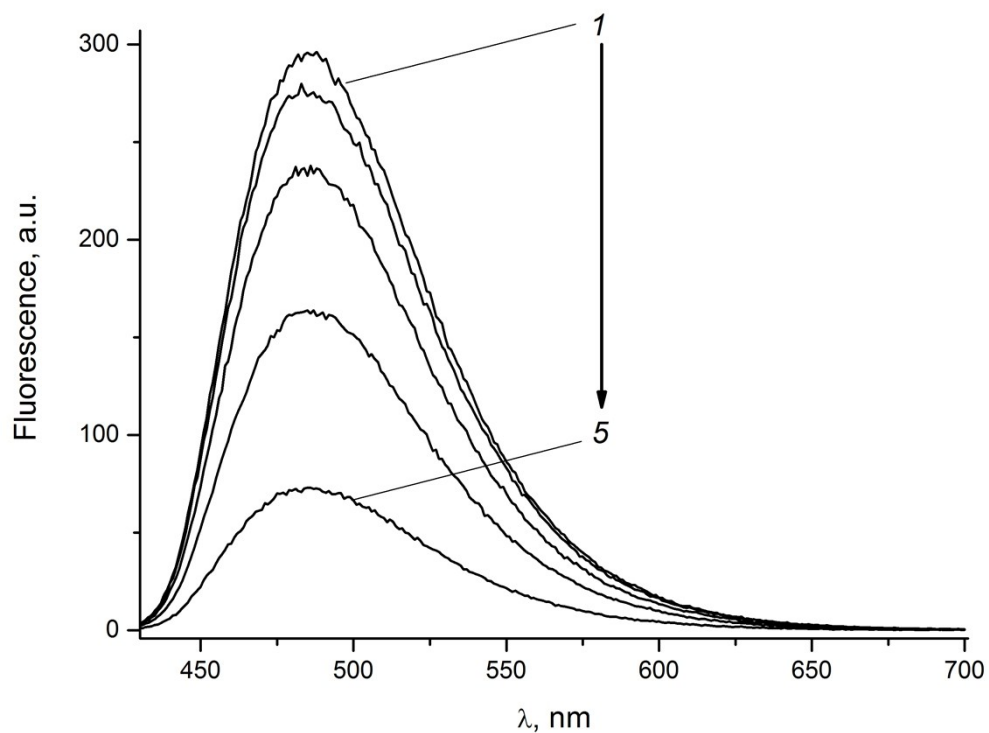

**Figure S34.** Fluorescence emission spectra of salt  $6aH^+ClO_4^-$  in acetonitrile ( $c = 2 \cdot 10^{-5} \text{ M}$ ) in the presence of naphthalene. The concentrations of naphthalene: 1 – 0, 2 –  $9.29 \cdot 10^{-4} \text{ M}$ , 3 –  $3.09 \cdot 10^{-3} \text{ M}$ , 4 –  $9.29 \cdot 10^{-3} \text{ M}$ , 5 –  $2.79 \cdot 10^{-2} \text{ M}$ .

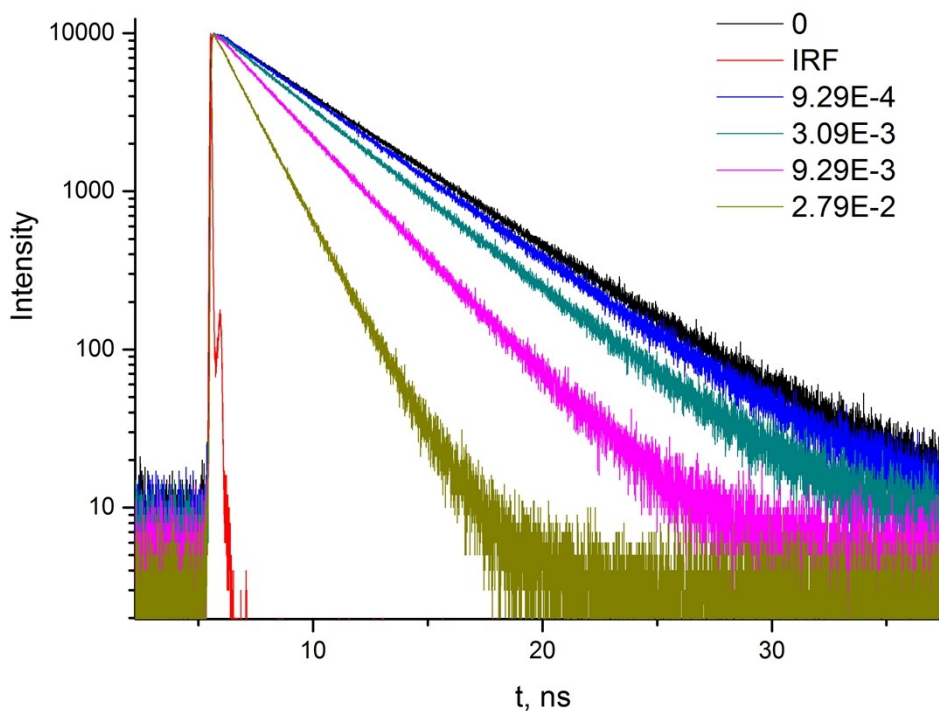

**Figure S35.** Fluorescence decay of salt  $6aH^+ClO_4^-$  in acetonitrile ( $c = 2 \cdot 10^{-5}$  M) in the presence of naphthalene. The concentrations of naphthalene are presented on the panel.

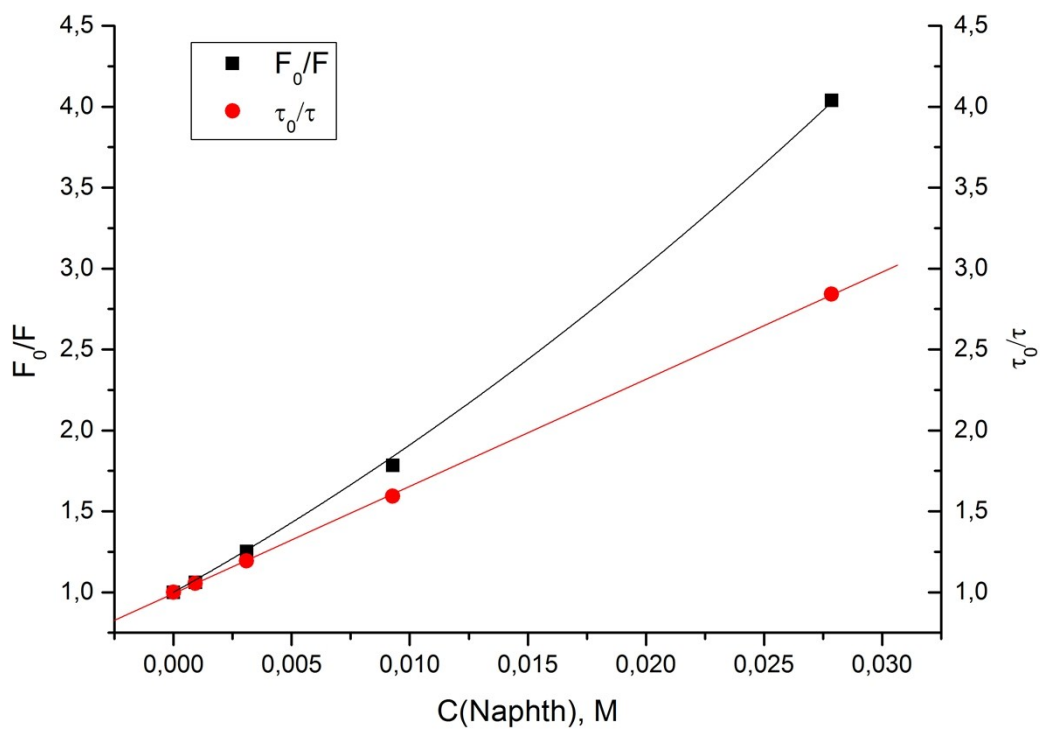

**Figure S36.** Fluorescence intensity (black squares) and lifetime (red circles) Stern-Volmer plots of  $6aH^+ClO_4^-$  quenching by naphthalene in MeCN. All lifetime values were measured at 480 nm. Symbols correspond to experimental data, lines are fittings according eq. 1 ( $\tau_0/\tau$ ) and eq. 2 ( $F_0/F$ ).

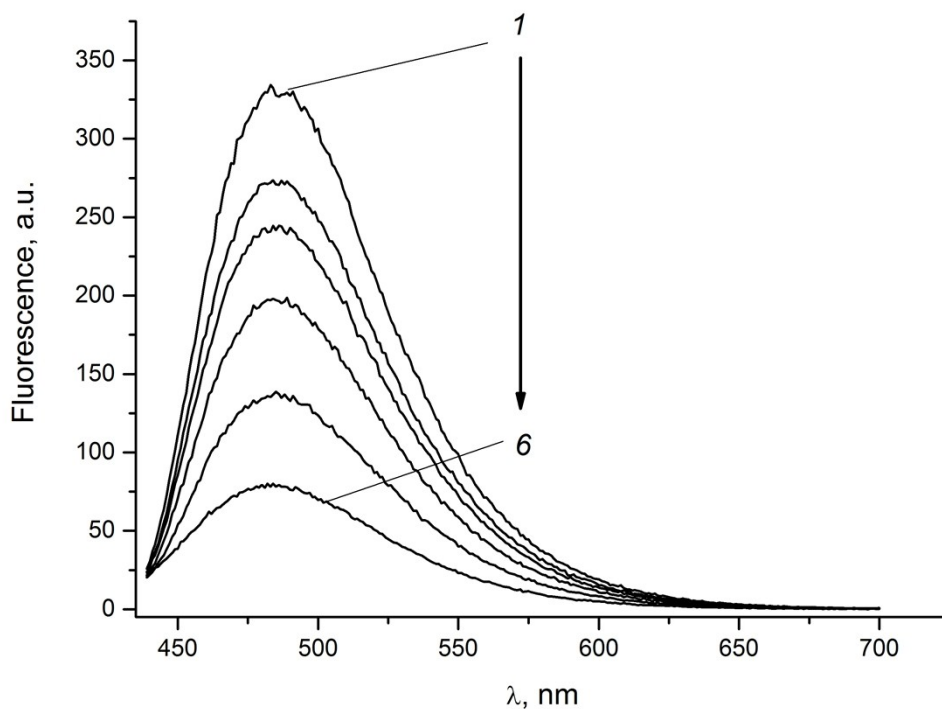

**Figure S37.** Fluorescence emission spectra of salt  $6aH^+ClO_4^-$  in acetonitrile ( $c = 2 \cdot 10^{-5}$  M) in the presence of indole. The concentrations of indole: 1 – 0, 2 –  $5.32 \cdot 10^{-4}$  M, 3 –  $1.77 \cdot 10^{-3}$  M, 4 –  $3.55 \cdot 10^{-3}$  M, 5 –  $7.09 \cdot 10^{-3}$  M, 6 –  $1.42 \cdot 10^{-2}$  M.

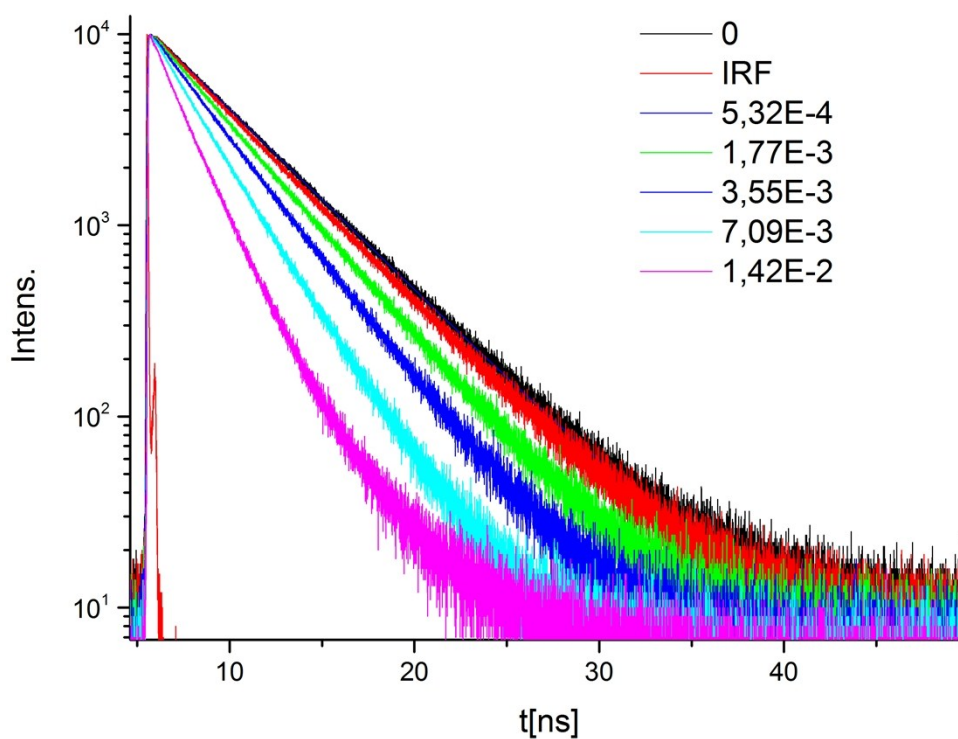

**Figure S38.** Fluorescence decay of salt  $6aH^+ClO_4^-$  in acetonitrile ( $c = 2 \cdot 10^{-5}$  M) in the presence of indole. The concentrations of indole are presented on the panel.

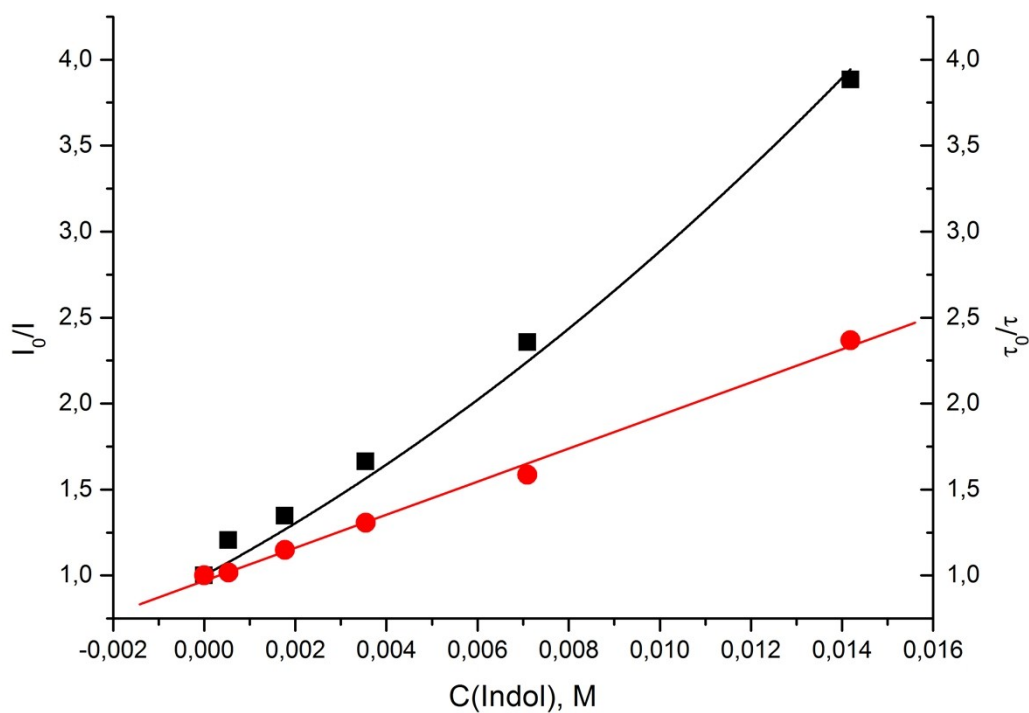

**Figure S39.** Fluorescence intensity (black squares) and lifetime (red circles) Stern-Volmer plots of  $6aH^+ClO_4^-$  quenching by indole in MeCN. All lifetime values were measured at 480 nm. Symbols correspond to experimental data, lines are fittings according eq. 1 ( $\tau_0/\tau$ ) and eq. 2 ( $I_0/I$ ).

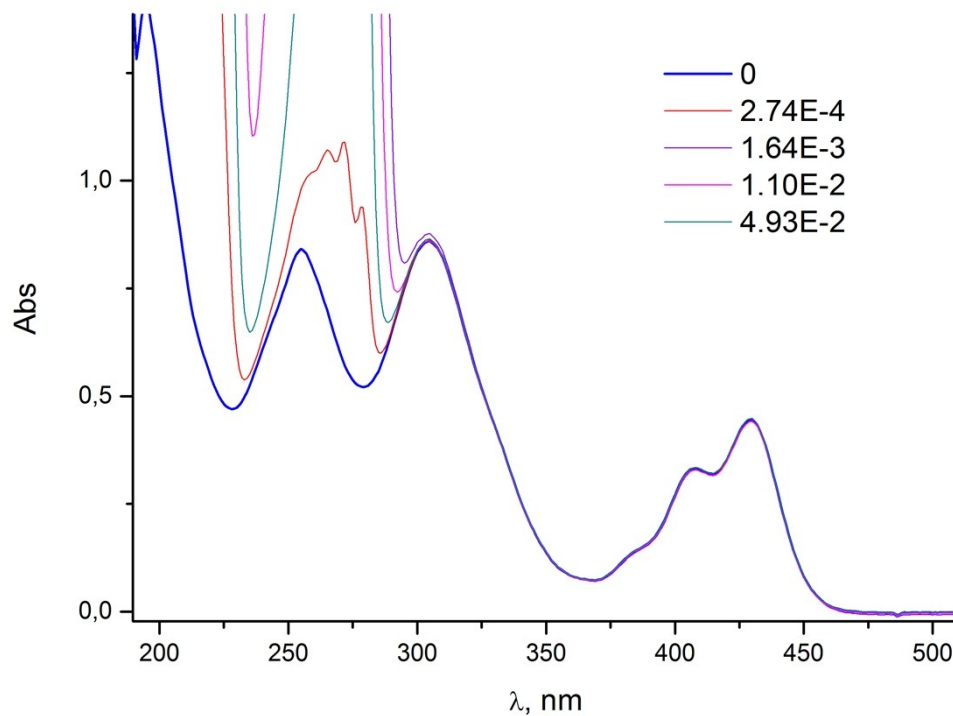

**Figure S40.** Absorption spectra of salt  $6aH^+ClO_4^-$  in acetonitrile ( $c = 2 \cdot 10^{-5}$  M) in the presence of PhOH. The concentrations of PhOH are presented on the panel.



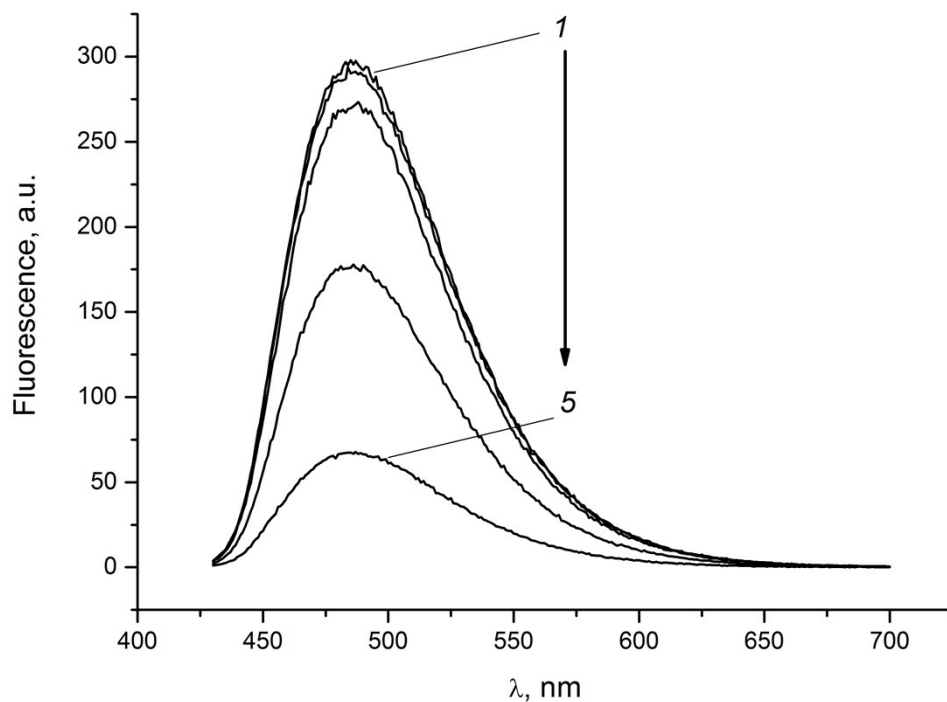

**Figure S41.** Fluorescence emission spectra of salt  $6aH^+ClO_4^-$  in acetonitrile in the presence of PhOH. The concentrations of PhOH: 1 – 0, 2 –  $2.74 \cdot 10^{-4}$  M, 3 –  $1.64 \cdot 10^{-3}$  M, 4 –  $1.10 \cdot 10^{-2}$  M, 5 –  $4.93 \cdot 10^{-2}$  M.

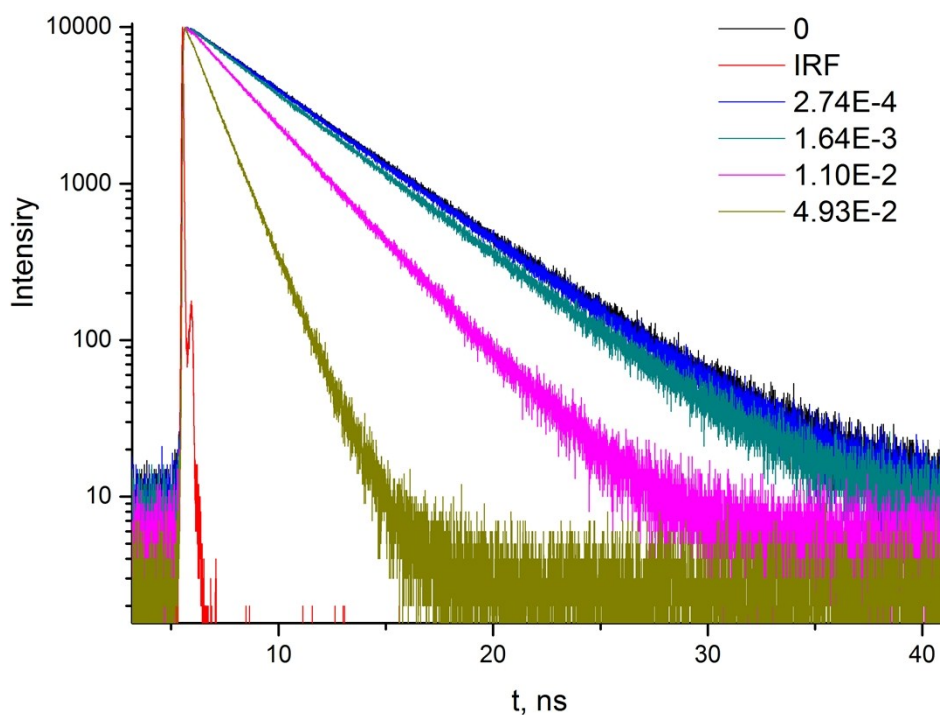

**Figure S42.** Fluorescence decay of salt  $6aH^+ClO_4^-$  in acetonitrile ( $c = 2 \cdot 10^{-5}$  M) in the presence of PhOH. The concentrations of PhOH are presented on the panel.

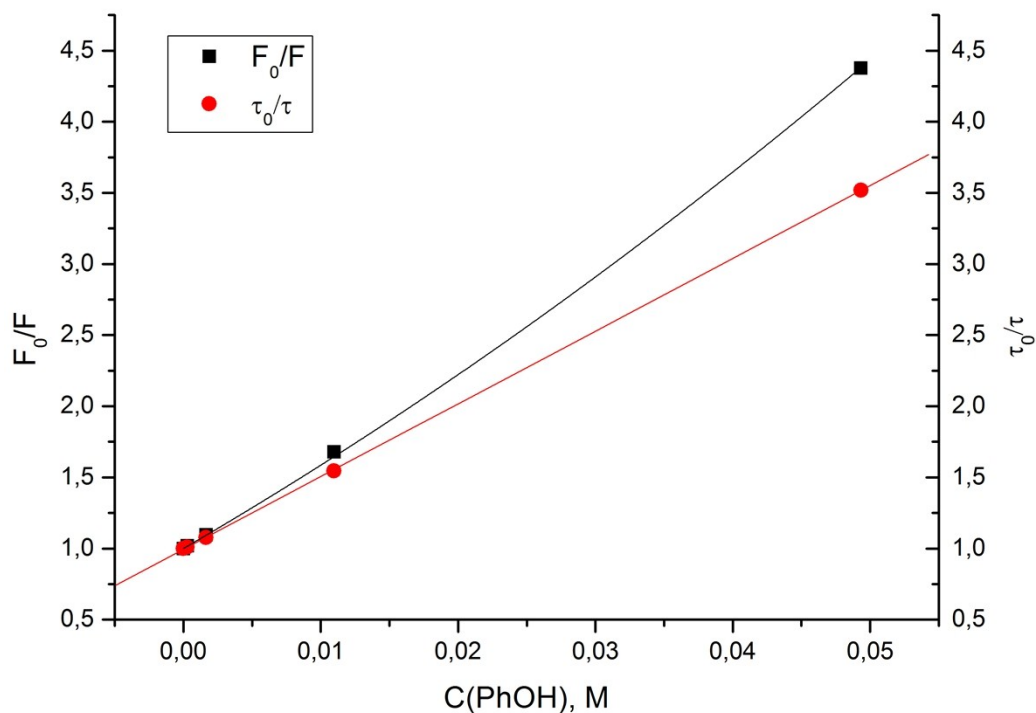

**Figure S43.** Fluorescence intensity (black squares) and lifetime (red circles) Stern-Volmer plots of  $6aH^+ClO_4^-$  quenching by PhOH in MeCN. All lifetime values were measured at 480 nm. Symbols correspond to experimental data, lines are fittings according eq. 1 ( $\tau_0/\tau$ ) and eq. 2 ( $F_0/F$ ).

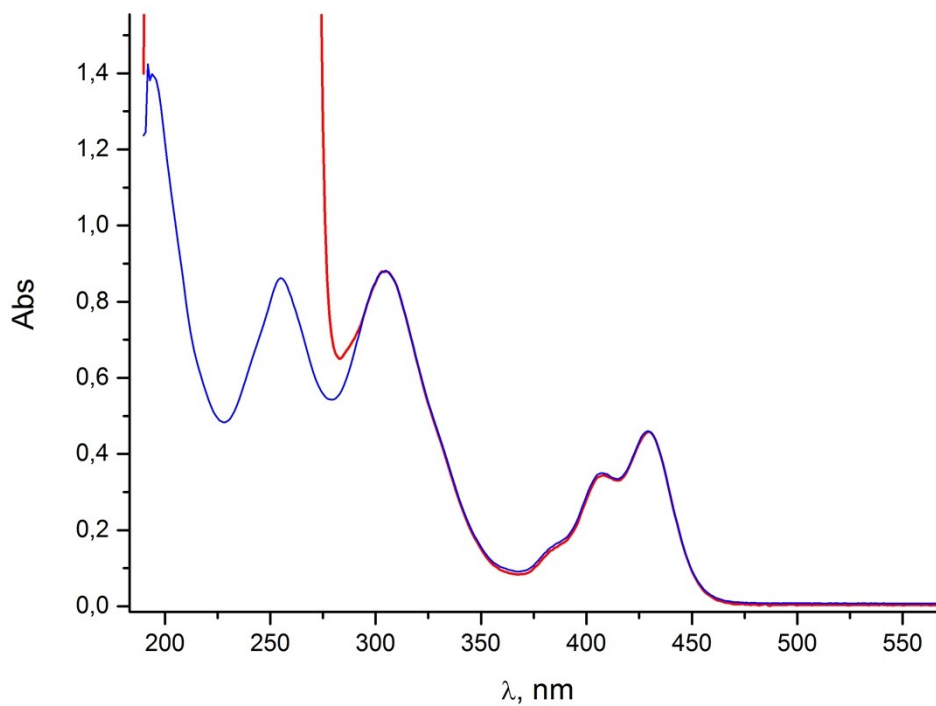

**Figure S44.** Absorption spectra of salt  $6aH^+ClO_4^-$  in acetonitrile ( $c = 2 \cdot 10^{-5}$  M) in the presence of 100 eq.  $PhCF_3$ .

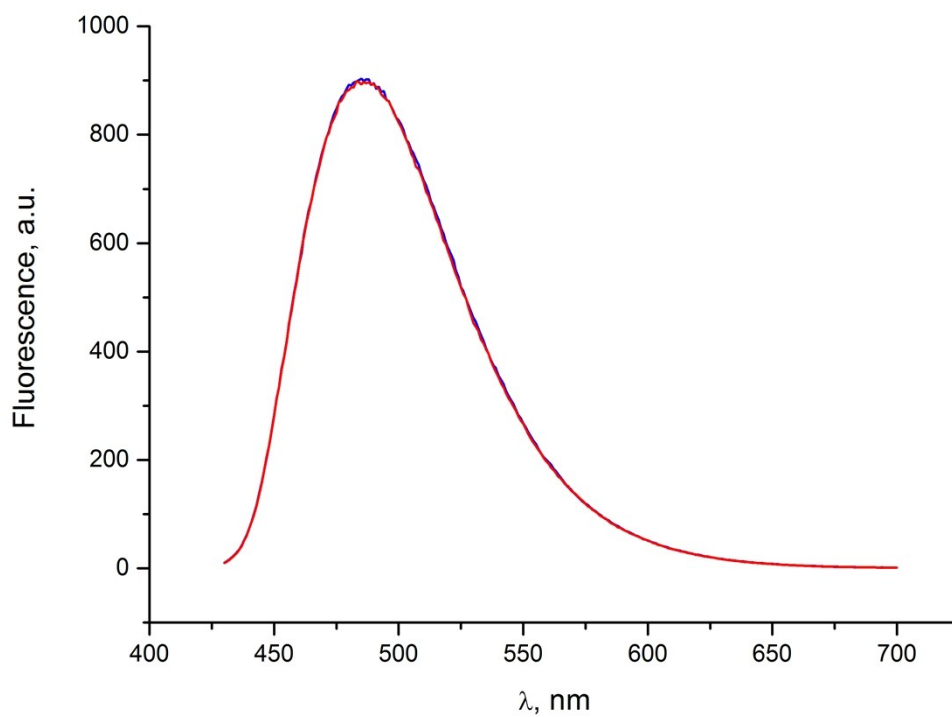

**Figure S45.** Fluorescence emission spectra of salt  $6aH^+ClO_4^-$  in acetonitrile ( $c = 2 \cdot 10^{-5} \text{ M}$ ) before and after addition of 100 eq. PhCF<sub>3</sub>.

**Table S2.** Crystal data and structure refinement for the studied compounds.

| Compound                                   | <b>5·HBr</b>                                                      | <b>5·PicOH</b>                                                    | <b>5·4/3H<sub>2</sub>O</b>                                        | <b>13</b>                                                         | <b>6a·HClO<sub>4</sub></b>                                        | <b>5·PhOH</b>                                                     |
|--------------------------------------------|-------------------------------------------------------------------|-------------------------------------------------------------------|-------------------------------------------------------------------|-------------------------------------------------------------------|-------------------------------------------------------------------|-------------------------------------------------------------------|
| Empirical formula                          | C <sub>18</sub> H <sub>13</sub> BrN <sub>2</sub>                  | C <sub>24</sub> H <sub>15</sub> N <sub>5</sub> O <sub>7</sub>     | C <sub>54</sub> H <sub>44</sub> N <sub>6</sub> O <sub>4</sub>     | C <sub>18</sub> H <sub>16</sub> N <sub>2</sub> O <sub>2</sub>     | C <sub>38</sub> H <sub>25</sub> ClN <sub>4</sub> O <sub>4</sub>   | C <sub>24</sub> H <sub>18</sub> N <sub>2</sub> O                  |
| Formula weight                             | 337.21                                                            | 485.41                                                            | 840.95                                                            | 292.33                                                            | 637.07                                                            | 350.40                                                            |
| <i>T</i> [K]                               | 120(2)                                                            | 120(2)                                                            | 100(2)                                                            | 120(2)                                                            | 100(1)                                                            | 100(2)                                                            |
| Crystal system                             | Monoclinic                                                        | Monoclinic                                                        | Triclinic                                                         | Monoclinic                                                        | Orthorhombic                                                      | Monoclinic                                                        |
| Space group                                | <i>P2<sub>1</sub>/n</i>                                           | <i>C2/c</i>                                                       | <i>P 1</i>                                                        | <i>P2<sub>1</sub>/n</i>                                           | <i>P2<sub>1</sub>2<sub>1</sub>2<sub>1</sub></i>                   | <i>P2<sub>1</sub>/n</i>                                           |
| <i>a</i> [Å]                               | 7.0000(3)                                                         | 20.993(7)                                                         | 10.755(3)                                                         | 4.6952(10)                                                        | 7.50014(11)                                                       | 21.179(4)                                                         |
| <i>b</i> [Å]                               | 10.6452(5)                                                        | 16.920(6)                                                         | 14.1162(14)                                                       | 20.135(4)                                                         | 16.7058(2)                                                        | 7.3790(15)                                                        |
| <i>c</i> [Å]                               | 18.2521(8)                                                        | 13.496(5)                                                         | 15.1222(15)                                                       | 14.864(3)                                                         | 22.9329(3)                                                        | 22.305(4)                                                         |
| $\alpha$ [°]                               | 90                                                                | 90                                                                | 117.094(2)                                                        | 90                                                                | 90                                                                | 90                                                                |
| $\beta$ [°]                                | 98.6140(10)                                                       | 119.796(6)                                                        | 99.240(2)                                                         | 93.406(4)                                                         | 90                                                                | 96.923(4)                                                         |
| $\gamma$ [°]                               | 90                                                                | 90                                                                | 90.860(2)                                                         | 90                                                                | 90                                                                | 90                                                                |
| <i>V</i> [Å <sup>3</sup> ]                 | 1344.74(10)                                                       | 4160(2)                                                           | 2007.2(6)                                                         | 1402.7(5)                                                         | 2873.40(7)                                                        | 3460.5(12)                                                        |
| <i>Z</i>                                   | 4                                                                 | 8                                                                 | 6                                                                 | 4                                                                 | 4                                                                 | 8                                                                 |
| <i>D<sub>c</sub></i> [g cm <sup>-3</sup> ] | 1.666                                                             | 1.550                                                             | 1.391                                                             | 1.384                                                             | 1.473                                                             | 1.345                                                             |
| $\mu$ [mm <sup>-1</sup> ]                  | 3.050                                                             | 0.117                                                             | 0.089                                                             | 0.092                                                             | 1.612                                                             | 0.083                                                             |
| Radiation                                  | MoK $\alpha$<br>( $\lambda$ = 0.71073)                            | CuK $\alpha$<br>( $\lambda$ = 1.54184)                            | MoK $\alpha$<br>( $\lambda$ = 0.71073)                            |
| No. of reflections collected/unique        | 16335/3581                                                        | 34687/4071                                                        | 19788/8644                                                        | 2707/2707                                                         | 39372/5985                                                        | 30401/6683                                                        |
| No. of parameters                          | 190                                                               | 348                                                               | 577                                                               | 204                                                               | 462                                                               | 495                                                               |
| <i>R</i> indices (all data)                | <i>R</i> <sub>1</sub> = 0.0367<br><i>wR</i> <sub>2</sub> = 0.0684 | <i>R</i> <sub>1</sub> = 0.1716<br><i>wR</i> <sub>2</sub> = 0.1758 | <i>R</i> <sub>1</sub> = 0.1275<br><i>wR</i> <sub>2</sub> = 0.0998 | <i>R</i> <sub>1</sub> = 0.0991<br><i>wR</i> <sub>2</sub> = 0.1877 | <i>R</i> <sub>1</sub> = 0.0423<br><i>wR</i> <sub>2</sub> = 0.1055 | <i>R</i> <sub>1</sub> = 0.1047<br><i>wR</i> <sub>2</sub> = 0.1296 |
| <i>R</i> -factor [%]                       | 2.71                                                              | 9.36                                                              | 5.23                                                              | 8.50                                                              | 3.93                                                              | 6.63                                                              |
| CCDC Dep. Nos.                             | 1920000                                                           | 1920001                                                           | 1920002                                                           | 1920003                                                           | 1920004                                                           | 1920005                                                           |
